1 **Mitochondrial membrane proteins and VPS35 orchestrate selective removal of mtDNA.**

2 David Pla-Martin<sup>1,2\*</sup>, Ayesha Sen<sup>1</sup>, Sebastian Kallabis<sup>2</sup>, Julian Nüchel<sup>3</sup>, Kanjanamas Maliphol<sup>1</sup>,  
3 Julia Hofmann<sup>1</sup>, Marcus Krüger<sup>2</sup> and Rudolf J. Wiesner<sup>1,2,4</sup>

4

5 **Affiliations**

6 <sup>1</sup>Center for Physiology and Pathophysiology, Institute of Vegetative Physiology, University of  
7 Köln, Köln, Germany

8 <sup>2</sup>Cologne Excellence Cluster on Cellular Stress Responses in Aging-associated Diseases  
9 (CECAD), University of Köln, Köln, Germany

10 <sup>3</sup>Center for Biochemistry, Faculty of Medicine, University of Köln, Köln, Germany

11 <sup>4</sup>Center for Molecular Medicine Cologne, University of Köln, Köln, Germany

12 \* Corresponding author: David Pla-Martin, PhD; [dplamart@uni-koeln.de](mailto:dplamart@uni-koeln.de)

13 **Abstract**

14 Integrity of mitochondrial DNA (mtDNA), encoding several subunits of the respiratory chain, is  
15 essential to maintain mitochondrial fitness. Mitochondria, as a central hub for metabolism, are  
16 affected in a wide variety of human diseases but also during normal ageing, where mtDNA  
17 integrity is compromised. Mitochondrial quality control mechanisms work at different levels, and  
18 mitophagy and its variants are critical to remove dysfunctional mitochondria together with  
19 mtDNA to maintain cellular homeostasis. Understanding the mechanisms governing a selective  
20 turnover of mutation-bearing mtDNA without affecting the entire mitochondrial pool is  
21 fundamental to design therapeutic strategies against mtDNA diseases and ageing. Here we  
22 show that mtDNA depletion after expressing a dominant negative version of the mitochondrial  
23 helicase Twinkle, or by chemical means, is due to an exacerbated mtDNA turnover. Targeting of  
24 nucleoids is controlled by Twinkle which, together with the mitochondrial transmembrane  
25 proteins ATAD3 and SAMM50, orchestrate mitochondrial membrane remodeling to form  
26 extrusions. mtDNA removal depends on autophagy and requires the vesicular trafficking protein  
27 VPS35 which binds to Twinkle-enriched mitochondrial subcompartments upon mtDNA damage.  
28 Stimulation of autophagy by rapamycin selectively removes mtDNA deletions which  
29 accumulated during muscle regeneration *in vivo*, but without affecting mtDNA copy number.  
30 With these results we unveil a new complex mechanism specifically targeting and removing  
31 mutant mtDNA which occurs outside the mitochondrial network. We reveal the molecular targets  
32 involved in a process with multiple potential benefits against human mtDNA related diseases,  
33 either inherited, acquired or due to normal ageing.

34

35

36

37

## 38 INTRODUCTION

39 The accumulation over time of mutations in the mitochondrial genome (mtDNA) is a common  
40 process which has been shown to occur in many tissues <sup>1</sup> and is probably one of the hallmarks  
41 of aging <sup>2</sup>. MtDNA is present in thousands of copies per cell, hence, impairment of mitochondrial  
42 function is observed only when the percentage of mutated mtDNA molecules surpasses a  
43 specific threshold<sup>3</sup>.

44 Cells possess a plethora of quality control mechanisms to survey the intactness of DNA, RNA  
45 and proteins, but also of entire organelles. In addition to bulk autophagy, which is responsible  
46 for the continuous and non-selective turnover of cellular material activated during nutrient  
47 shortage, specific mechanisms are initiated to remove malfunctioning organelles upon damage.  
48 The process of mitophagy has been investigated extensively in recent years as an important  
49 salvage pathway to remove dysfunctional mitochondria <sup>4</sup>. The ongoing fission and fusion events  
50 of the dynamic mitochondrial network are important processes in order to survey mitochondrial  
51 quality by predisposing those parts of the network with impaired function to degradation.  
52 Mitochondrial fission is a requirement to initiate mitophagy of damaged mitochondria <sup>4</sup>, whereas  
53 knockout of key players of mitochondrial fusion has been shown to induce mtDNA instability,  
54 either by causing a rapid accumulation of mtDNA alterations over time <sup>5</sup> or by mtDNA depletion  
55 <sup>6</sup>.

56 Recently, a process with a high level of specificity involving mitochondrial derived vesicles  
57 (MDVs) was shown to remove not the complete organelle, but rather mitochondrial fragments  
58 containing specific cargo<sup>7,8</sup>. This mechanism requires the coordination of mitochondrial  
59 dynamics, mitophagy and also the vacuolar protein sorting (VPS) or retromer complex. In this  
60 process, changes in the mitochondrial membrane potential and the oxidation state of  
61 mitochondrial subcompartments induce the curvature of the membrane which is followed by  
62 recruitment of PINK1 and PARKIN <sup>9</sup>. The retromer complex, formed by VPS26, VPS29 and  
63 VPS35, provides the force to generate a vesicle which is then delivered to lysosomes or  
64 peroxisomes in a process which is independent of the autophagy proteins ATG5 or LC3 <sup>10-12</sup>. In  
65 summary, mitophagy and its variants are crucial pathways to degrade parts of the mitochondrial  
66 network, thus maintaining cellular fitness.

67 Many inherited forms of neurodegenerative diseases are examples for insufficient mitochondrial  
68 quality control. Mutations of specific receptors involved in targeting dysfunctional organelles to  
69 mitophagy like PINK1 and PARKIN, but also malfunction of lysosomal proteins ATP13A2 and  
70 LAMP3 among many others, as well as mutations in the retromer component *VPS35* <sup>13</sup> cause  
71 familial forms of Parkinson's disease. Parkinson's disease is caused by the specific  
72 degeneration of dopaminergic neurons which have been comprehensively shown to be a  
73 hotspot for the accumulation of large scale mtDNA deletions during normal aging <sup>14,15</sup> making  
74 mitochondrial quality control mechanisms especially important in these cells. Unfortunately,  
75 these mechanisms are not sufficient to counteract the often progressive phenotype of patients  
76 suffering from PD and other diseases caused by either maternally inherited or by acquired  
77 mtDNA alterations, the latter due to mutations in proteins essential for mtDNA replication and

78 maintenance<sup>16</sup>. Thus, therapeutic approaches to increase mitochondrial quality control and  
79 counteract the progression of mtDNA related diseases have been attempted<sup>17,18</sup>, but a lack of  
80 specificity and activation of undesirable effects are still a hallmark<sup>19</sup>. Therefore, understanding  
81 the specific mechanisms governing mtDNA turnover is pivotal to develop new therapeutic  
82 strategies against these syndromes.

83 Expressing the mitochondrial helicase Twinkle bearing dominant negative mutations causing  
84 mitochondrial disease in patients induces mtDNA instability<sup>20</sup>. Expression of the disease related  
85 *PEO1* Twinkle mutation K320E (from now on K320E) in mouse models accelerates the  
86 accumulation of mtDNA deletions in postmitotic tissues like heart and muscle<sup>21,22</sup> during aging  
87 and induce mtDNA depletion in proliferating cells such as epidermis and cartilage<sup>23,24</sup>. Recently,  
88 it has been shown that muscles from those mice accumulated deletions, but the main  
89 alterations were gene duplications, leading to a vast variety of different enlarged and rearranged  
90 molecules<sup>25</sup>. Using a combination of *in vivo* and *in vitro* approaches, we have now identified the  
91 proteins involved in a new mechanism for targeting and specific degradation of mtDNA to avoid  
92 the accumulation of such mutations. Expression of K320E induces the formation of  
93 mitochondrial extrusions, much larger than MDVs, which are consecutively engulfed by  
94 autophagosomes and fused with lysosomes. Elimination of altered mtDNA molecules is  
95 preceded by the relocation of nucleoids to the poles of mitochondria, a process controlled by the  
96 interaction between the mitochondrial inner membrane protein ATAD3 and the nucleoid protein  
97 Twinkle. The translocase protein SAMM50 and VPS35 are essential to provide the required  
98 selectivity and specificity for mtDNA elimination. We show that stimulation of autophagy by  
99 rapamycin *in vivo* is sufficient to specifically remove deleted mtDNA, but without affecting the  
100 total mtDNA copy number. Thus, modulation of autophagy *in vivo* can be used as an approach  
101 to counteract the accumulation of mutations in mtDNA observed in several mitochondrial  
102 pathologies and during aging.

103

## 104 **RESULTS**

105

### 106 **Accumulation of mtDNA mutations in skeletal muscles *in vivo* does not induce** 107 **mitophagy**

108 In a previous work we have found that, in extraocular muscles, which are first affected in *Peo1*  
109 patients, mtDNA alterations preferentially accumulated in fast twitch in contrast to slow oxidative  
110 fibers, indicating important differences in mitochondrial quality control mechanisms in different  
111 muscle fiber types<sup>22</sup>. To study the nature of these mechanisms surveillant mtDNA integrity, we  
112 first analysed fast-twitch M. tibialis anterior (TA) and slow-oxidative M. soleus (SOL), muscles  
113 both rich in fibers with a high mitochondrial content in mice, but with a preferentially glycolytic  
114 (TA) vs. oxidative metabolism (SOL), respectively. As shown before by deep sequencing<sup>25</sup>, both  
115 muscles showed an accumulation of many mtDNA alterations in 24 months old animals (Fig.  
116 1a). K320E mutant mice carry a wide variety of reorganized mtDNA molecules<sup>25</sup>, causing an  
117 inefficient amplification reaction leading to a smear of products, however there were no changes

118 in total mtDNA copy number (Fig. 1b). Noteworthy, TA from aged wt mice also showed many  
119 mtDNA alterations, while only few were found in SOL. By conventional PCR, we analysed the  
120 presence of deletions common in aged mice<sup>22</sup> and selected a deletion covering about 4000bp  
121 (*Mus musculus* mtDNA- $\Delta^{983-4977}$ ), which was present in both mutant muscles (Fig. S1a).  
122 Considering that mtDNA copy number is on average 20% higher in SOL than in TA (Fig. S1b),  
123 we performed qPCR quantification using the D-Loop region as a reference and found that  
124 indeed, this deletion was on average 20 times more abundant in TA compared to SOL (Fig. 1c).  
125 Steady state levels of common mitochondrial autophagy markers showed that in SOL of  
126 K320E<sup>skm</sup> mice, the general autophagy adaptors p62 and LC3 were significantly decreased  
127 while levels were similar in TA (Fig. 1d, e). Levels of the specific mitophagy adaptor Optineurin  
128 (OPT) and the mitochondrial marker TOM20 were similar in all samples. *In situ*  
129 immunofluorescence of LC3 and p62 confirmed reduced puncta of those proteins (Fig. S1c-f).  
130 Since such a reduction could reflect both an increase or a decrease of autophagy flux, we  
131 blocked autophagy flux by chloroquine, and analysed the conversion of LC3-I to LC3-II (Fig. 1f,  
132 g). We did not observe an increased autophagy flux in K320E mice compared to control mice.  
133 However, in SOL for K320E mice, chloroquine was not inducing a change in the LC3 ratio  
134 suggesting that, in this muscle, autophagy flux was already at maximum level in steady state.  
135 We therefore hypothesized that oxidative fibres, which are most dependent on intact  
136 mitochondria, possess a faster mitochondrial turnover, hence maintaining mutated mtDNA  
137 molecules more efficiently below a pathogenic threshold. To visualize protein synthesis *in vivo*,  
138 we fed our mice with heavy lysine (<sup>13</sup>C<sub>6</sub>-lysine) for two weeks in order to get an estimate for  
139 mitochondrial turnover rates<sup>26</sup>. Here, we selected SOL and M. extensor digitorum longus (EDL)  
140 for analysis, since the latter contains almost exclusively glycolytic fibers. We first confirmed that  
141 heavy Lysine incorporation was equal in all animals (Fig. S2a, b). We analysed H/L (heavy/light)  
142 ratios of detected proteins (1286 and 1224 for SOL, 1042 and 1018 for EDL in wild-type and  
143 K320E<sup>skm</sup> mice, respectively) and filtered the mitochondrial proteins using Mitocarta 3.0  
144 (Supplementary Table 1; Fig. S1c). Surprisingly, no mitochondrial protein was showing  
145 differential incorporation of heavy lysine comparing K320E mutant and wild-type animals,  
146 neither in EDL nor in SOL, suggesting that bulk mitochondrial turnover, here measured as an  
147 increase of mitochondrial biogenesis, is not enhanced in muscles bearing mtDNA alterations  
148 (Fig. 1h).

149

#### 150 **Autophagy is required for depletion of mtDNA following oxidative damage**

151 To further dissect the molecular pathways activated upon mtDNA instability, we generated  
152 stable C2C12 myoblast cell lines expressing tagged versions of Twinkle and K320E.  
153 Colocalization of these variants with mitochondria (outer membrane marker TOM20, Fig. S3a,  
154 b) as well as colocalization with mtDNA and the mtDNA binding protein TFAM was confirmed  
155 (Fig. S3c, d), showing that Twinkle is enriched in mitochondrial nucleoids.

156 To investigate if K320E expression leads to activation of autophagy or mitophagy in these cells,  
157 C2C12 myoblasts were additionally transfected with plasmids encoding LC3-GFP-mCherry or

158 Fis1p-GFP-mCherry. Expression of K320E induced the accumulation of autolysosomes marked  
159 by LC3-GFP-mCherry (Fig. 2a, b; magenta signal). In agreement with our *in vivo* pSILAC  
160 results, expression of Fis1p-GFP-mCherry, a mitophagy reporter, showed no activation of acute  
161 mitophagy (Fig. 2c, d). Previous studies have demonstrated that the *in vitro* expression of  
162 several Twinkle missense mutations often leads to accumulation of mtDNA replication  
163 intermediates, producing mtDNA depletion<sup>27</sup>. Consistently, expression of K320E leads to  
164 mtDNA depletion (Fig. 2e), but this was not related to a decrease in mtDNA replication rate, as  
165 observed by analysis of mtDNA replication foci in BrdU labelled cells (Fig. S4a, b). We  
166 hypothesized that accumulation of lysosomes and mtDNA depletion after expressing K320E  
167 was reflecting a novel selective mtDNA degradation process. Thus, we blocked lysosomal  
168 activity using chloroquine and showed that, indeed, under these conditions, mtDNA levels  
169 remained at control levels (Fig. 2f). Finally, we analysed the spatial relationship between  
170 Twinkle foci and autophagy structures, using LC3 as an autophagosome marker and Lamp1 as  
171 a late endosomal marker, respectively. As expected, most wt Twinkle foci distributed in a  
172 pattern reflecting the mitochondrial network and were independent of autophagy markers (Fig.  
173 2g-j). However, colocalization with LC3 and LAMP1, respectively, was observed with K320E.  
174 The increased mtDNA degradation flux in K320E cells suggests that expression of this  
175 missense mutation harms mtDNA by unknown means. To visualize *in situ* mtDNA damage, we  
176 searched for the presence of 8-hydroxy-2'-deoxyguanosine (8-OHdG), a specific base  
177 modification induced by reactive oxygen species<sup>28</sup>. We could not observe any specific staining  
178 with  $\alpha$ -8-OHdG in steady state levels (Fig. S4c, d), however when cells were incubated in  
179 presence of chloroquine, we detected a specific accumulation of 8-OHdG decorating the  
180 mitochondrial network only in K320E expressing cells (Fig. 2k, l). In summary, our data indicate  
181 that K320E induces mtDNA depletion in a lysosome-dependent manner without involving acute  
182 mitophagy, pointing to a more specialized path.

183 To further analyse the contribution of autophagy to mtDNA turnover, we turned to Atg5 KO  
184 MEFs and expressed Twinkle variants (Fig. 3a), since Atg5 has been shown to be important in  
185 quality control after mitochondrial damage<sup>29</sup>. Analysis of mitochondrial nucleoids showed that  
186 K320E expression decreased nucleoid foci number in Atg5 wt cells (Fig. 3b). In contrast, in Atg5  
187 KO cells, foci number was not altered by K320E expression (Fig. 3c). Nevertheless, expression  
188 of K320E reduced mtDNA copy number in both Atg5 WT and Atg5 KO cells (Fig. 3d, e).  
189 Analysis of mtDNA replication by BrdU labelling showed that, in contrast to wt cells, expression  
190 of K320E in autophagy deficient cells led to a reduced number of foci replicating mtDNA within  
191 the mitochondrial network (Fig. 3f, g). Chloroquine treatment also restored mtDNA copy number  
192 in Atg5 WT cells expressing K320E but not in Atg5 KO cells (Fig. 3h). Our data suggest that in  
193 contrast to wt cells where K320E induces mtDNA depletion linked to an increased nucleoid  
194 turnover rate, in autophagy deficient cells, mtDNA depletion is caused by reduced mtDNA  
195 replication, presumably to avoid accumulation of excessive mtDNA damage.

196 Therefore, to evaluate the role of autophagy in mtDNA depletion, we induced mtDNA alterations  
197 by growing these cells for 7 days in medium containing Ethidium Bromide (EtBr), which we also

198 found to provoke the accumulation of 8-OHdG within the mitochondrial network (Fig. S4c, e).  
199 Morphological analysis of mitochondrial nucleoids showed that EtBr decreases foci number in  
200 Atg5 WT cells but not in Atg5 KO (Fig. 3i-k). In line with this, Atg5 control cells showed  
201 consistent mtDNA depletion, whereas in Atg5 KO cells mtDNA copy number remained  
202 unchanged (Fig. 3l). This EtBr-induced depletion could not be recovered by overexpression of  
203 wt Twinkle, indicating again a prominent role of autophagy in mtDNA depletion in this case.  
204 All these data together confirm that mtDNA damage induces activation of a mtDNA turnover  
205 mechanism, which is dependent on autophagosome formation and specifically degrades  
206 mtDNA but it does not activate an acute mitophagy response.

207

### 208 **mtDNA instability induces the formation of mitochondrial protrusions prior to lysosomal** 209 **degradation**

210 One of the most surprising features we noticed while studying cellular localization of Twinkle  
211 was that TOM20, a mitochondrial outer membrane marker, does not consistently overlap with  
212 Twinkle, a mitochondrial matrix protein (Fig. 4a and S3a, b). Live imaging microscopy using  
213 C2C12 clones expressing Twinkle-mCherry showed that occasionally, Twinkle moved to  
214 Mitotracker Green-negative poles of the network releasing a small particle which was also  
215 Mitotracker-negative (Fig. 4b, arrows). These particles were more evident in K320E expressing  
216 cells, where most of K320E was residing in such Mitotracker-negative structures (Fig. 4c). As  
217 Mitotracker green is independent of the inner membrane potential, we ruled out the possibility  
218 that these regions were depolarized areas of the mitochondrial network but mitochondrial  
219 regions with different cardiolipin composition.

220 To determine Twinkle localisation with high resolution, we used Twinkle-APEX2 fusion versions  
221 in C2C12 cell lines. APEX2 generates a black precipitate in the presence of DAB, which is  
222 visible by electron microscopy. Twinkle-APEX2 distribution in the matrix was heterogeneous  
223 and the organization of mitochondria and other cellular organelles was undisturbed by its  
224 expression (Fig. 4d). K320E-APEX2, however, accumulated in poles of the network, sometimes  
225 close to abnormal cristae structures (Fig. 3d, red arrows) and also inside lysosomes (Fig. 4d,  
226 red stars). Such multi-membrane structures were also observed in cells expressing a  
227 mitochondrial matrix targeted APEX2, but in that case, they did not show DAB precipitate (Fig.  
228 4d, red stars). A very recent study demonstrated that mitochondrial fission occurring at  
229 mitochondrial poles is followed by mitophagy of mitochondrial compartments containing non-  
230 replicative mtDNA, and that this is preceded by mitochondrial cristae reorganization<sup>30</sup>. Indeed,  
231 electron tomography of K320E expressing cells revealed that these structures are derived from  
232 the inner mitochondrial membrane and that they are formed by protrusions containing  
233 reorganized mitochondrial cristae (Fig. 4e).

234

### 235 **Twinkle interacts with membrane proteins to facilitate mtDNA removal**

236 We speculated that mtDNA targeting prior to degradation is controlled by specific protein-protein  
237 interactions. Thus, as Twinkle follows mtDNA positioning and degradation through lysosomes,

238 we sought to investigate how nucleoids containing Twinkle distribute in the mitochondrial matrix  
239 by analysing the Twinkle interactome. We performed immunoprecipitation of wt Twinkle fused to  
240 a V5-APEX2 epitope followed by mass spectrometry analysis. As expected, the majority of  
241 proteins interacting with Twinkle were related to mtDNA replication, transcription and translation  
242 (Supplementary Table 2), but only a few interactions were found to be significant (Fig. 5a, blue  
243 dots), one of them being ATAD3, an AAA-ATPase previously linked to anchoring and  
244 distribution of mtDNA to the inner membrane <sup>31</sup>. Direct co-immunoprecipitation and  
245 immunofluorescence confirmed the physical interaction between ATAD3 and Twinkle (Fig. 5b;  
246 Fig. S5a) enlightening Twinkle as an important part of the link between mitochondrial nucleoids  
247 and the inner membrane.

248 To evaluate the role of these proteins in mtDNA turnover, we generated constitutive *Atad3*  
249 knock-down (KD) clones (shAtad3\_1+2, shAtad3\_3; Fig. S5b, c). *Atad3* KD clones showed  
250 steady state levels of mtDNA copy number comparable to control lines (Fig. 5c, d) and no  
251 changes in mitochondrial morphology (Fig. S5d). After one week of mild treatment with EtBr,  
252 control cells showed a persistent decrease of mtDNA copy number. However, this depletion  
253 was not observed in *Atad3* KD clones (Fig. 5d). Number of nucleoid foci per cell was also higher  
254 in downregulated clones than in control cells upon EtBr treatment (Fig. 5e). These data suggest  
255 that nucleoid binding to the mitochondrial inner membrane through a Twinkle-ATAD3 interaction  
256 is essential for mtDNA elimination upon mtDNA damage.

257

### 258 **mtDNA turnover requires coordination of the retromer complex in a process independent** 259 **of MDVs**

260 We initially hypothesized that selective removal of mitochondrial fragments containing mtDNA  
261 was carried out through MDVs <sup>7</sup>. The E3 Ubiquitin ligase MAPL has been shown to direct  
262 mitochondrial cargo to peroxisomes <sup>32</sup>, while the endosomal adaptor Tollip specifically divert  
263 MDVs to lysosomes <sup>8</sup>. In both cases, the VPS35-retromer complex initiates the force to  
264 generate a vesicle <sup>10</sup>. Thus, in order to investigate if the specific mtDNA degradation we  
265 observed follows the MDV or a new pathway, we studied VPS35 and MAPL localization in  
266 Twinkle-mCherry expressing cells. Consistent with previous studies, expression of MAPL-GFP  
267 induced mitochondrial fission and formation of structures excluding TOM20 (Fig. S6a) <sup>32</sup>.  
268 However, Twinkle was also excluded from those particles. Chloroquine treatment for 4h was  
269 sufficient to induce a rapid accumulation of Twinkle positive structures excluding TOM20 and  
270 MAPL, suggesting that the fate of those particles is the lysosomal compartment (Fig. S5b). In  
271 addition, we also corroborate that Twinkle colocalizes with VPS35 but excludes MAPL (Fig.  
272 S6c, d).

273 Next, we treated these cells as well with EtBr to induce mtDNA damage. One week of treatment  
274 was sufficient to reduce mtDNA copy number (Fig. S7a). Image quantification revealed that the  
275 percentage of VPS35 containing Twinkle was strongly increased upon EtBr treatment (Fig. 6a-  
276 c), even when the overall steady state levels of VPS35 structures did not change (Fig. 6d).  
277 Importantly, VPS35 also colocalized with dsDNA (Fig. 6e).

278 We then generated Vps35 KO clones in MEFs and selected two monoclonal lines targeting  
279 exon 4 (*Vps35\_Ex4*) and exon 5 (*Vps35\_Ex5*) (Fig. S6b, c). Vps35 KO cells showed no  
280 changes in mtDNA foci number but reduced levels of mtDNA copy number in steady state (Fig.  
281 6f-h) and mitochondrial fragmentation (Fig. S7d). After 7 days of EtBr treatment, the number of  
282 mtDNA foci was further decreased (Fig. S7e, f) and mtDNA depletion was enhanced (Fig. S7g,  
283 h). We analysed the activation of canonical mitophagy in steady state by expressing Fis1p-  
284 GFP-mCherry (Fig. 6i) and found that, indeed, in Vps35 KO cells, acute mitophagy was  
285 activated (Fig. 6j). Moreover, VPS35 protein level was shown to be affected by lysosomal  
286 function, as chloroquine induced VPS35 accumulation in K320E cells (Fig. S7i, j) without  
287 interfering with late endosomes or mitochondrial content (Fig. S7i-n).

288 We hypothesize that VPS35 is necessary to fine-tune the elimination of mutated mtDNA without  
289 activating acute mitophagy and sought to investigate how VPS35 is recruited to mitochondria  
290 upon mtDNA damage. Thus, we performed VPS35 IP followed by MS analysis under basal  
291 conditions and in cells treated 7 days with EtBr (Fig. S8a). As expected, in basal medium the  
292 protein profile of VPS35 IP revealed poor interaction with mitochondrial proteins (Fig. 7a, red  
293 dots). Upon EtBr treatment, however, the association of mitochondrial proteins was markedly  
294 increased (Fig. 7b, c). Among them, we noticed the presence of mitochondrial membrane  
295 proteins such as VDAC1 and VDAC3, TIMMDC1 or TOMM40 as well as SAMM50, which  
296 interaction was confirmed by coimmunoprecipitation (Fig. 7d). The comparison of IP protein  
297 profiles of cells in basal vs. EtBr medium highlighted also a strong enrichment of the mAAA  
298 protease SPG7 (Fig. S8b). Remarkably, comparison between the IP protein profiles from  
299 Twinkle and K320E revealed also a strong enrichment of SAMM50 upon K320E  
300 immunoprecipitation (Fig. 7e). SAMM50 belongs to the sorting and assembly machinery in the  
301 mitochondrial intermembrane space and has important functions in the biogenesis of respiratory  
302 complexes, cristae morphology and mitochondrial shape<sup>33</sup>. It was also described as a regulator  
303 of PINK1-Parkin mediated mitophagy but excluding the mtDNA for degradation<sup>34</sup>.  
304 Immunoprecipitation of Twinkle confirms that, after mtDNA damage with EtBr, Twinkle can  
305 physically interact with SAMM50 (Fig. 7f).

306 Thus, we hypothesize that SAMM50, a protein located in the mitochondrial outer membrane,  
307 could serve as a platform to recruit VPS35 and eliminate mitochondrial subcompartments  
308 containing damaged mtDNA. Consequently, we generated SAMM50 shRNA KD clones and  
309 expressed Twinkle-mCherry (Fig. 7g; Fig. S8c, d). EtBr does not affect the overall population of  
310 VPS35 but enhances recruitment to Twinkle (Fig. 7g-i). However, the percentage of VPS35-  
311 Twinkle contacts were reduced in absence of SAMM50 (Fig. 7i). To decipher if VPS35  
312 recruitment shows Twinkle specificity, we examined VPS35 colocalization with LRPPRC, a  
313 native mitochondrial matrix protein (Fig. S8e). Again, the overall number of VPS35 particles  
314 was unchanged by EtBr treatment (Fig. S8f) and in this case, we observed that VPS35 contacts  
315 with LRPPRC were not increased and therefore, there was no effect following Samm50  
316 downregulation (Fig. S8g).



317 In summary, our data thus demonstrate that VPS35 is required for mitochondrial quality control  
318 in the presence of mtDNA alterations. We show that a mechanism to specifically remove  
319 mtDNA is activated when mtDNA damage is induced both genetically or chemically by K320E or  
320 by EtBr, respectively. ATAD3 is required for specific membrane localization of nucleoids,  
321 SAMM50 confers nucleoid specificity and VPS35 is involved in fine-tuning of this selective  
322 process, removing specific parts of mitochondria containing affected nucleoids, thus avoiding  
323 the activation of acute mitophagy which would affect the functional mitochondrial pool.

324

### 325 **Rapamycin eliminates mtDNA alterations without affecting copy number**

326 Since our data highlight that autophagy, together with a specific nucleoid extraction mechanism,  
327 plays an important role in maintaining mtDNA fitness *in vitro*, we aimed to test whether this is  
328 also relevant *in vivo*. We have previously shown that expression of K320E in skeletal muscle  
329 leads to the accumulation of mtDNA alterations, unfortunately only in very old animals, making  
330 this model not very convenient<sup>22</sup> (Fig. 1). However, expression of K320E in muscle satellite  
331 cells (Pax7-Cre<sup>ERT</sup>; K320E<sup>msc</sup>), followed by cardiotoxin-induced muscle damage and one week  
332 of regeneration, shows a rapid accumulation of mtDNA alterations, leading to newly generated,  
333 cytochrome-c-oxidase (COX) negative fibers (stained blue, Fig. S8a, b), while mtDNA copy  
334 number remained stable (Fig. S8c). In several mitochondrial disease models, it has been shown  
335 that rapamycin, an activator of autophagy through the specific inhibition of mTORC1, is able to  
336 revert mitochondrial dysfunction and ameliorate disease progression. This probably occurs by  
337 stimulating mitochondrial turnover mechanisms<sup>35</sup>, and, *in vitro* it was also shown to direct  
338 selection against mtDNA mutations<sup>36</sup>. Interestingly, genetic induction of autophagy was shown  
339 to reduce mtDNA deletions in *Drosophila*<sup>37</sup>. Thus, to test if activation of autophagy can purify  
340 mtDNA alterations also in mammals *in vivo*, we used this muscle regeneration paradigm in  
341 combination with rapamycin treatment. Regenerated muscles from vehicle treated K320E<sup>msc</sup>  
342 mice showed a prominent accumulation of COX negative fibers indicating mitochondrial  
343 dysfunction (Fig. 8a). In contrast, mice treated with rapamycin showed much less COX deficient  
344 cells in the regenerated area (Fig. 8a-c). Consistently, qPCR analysis revealed that mtDNA  
345 copy number remained unchanged (Fig. 8d), while mtDNA alterations were absent and thus had  
346 been purified (Fig. 8e). We noticed that COX staining was much lighter in rapamycin treated  
347 animals, suggesting a change in mitochondrial OXPHOS activity. Vehicle treated mice showed  
348 a predominant accumulation of glycolytic fiber type 2b in both wt and K320E<sup>msc</sup> mice (Fig. S9d),  
349 while in rapamycin treated wt mice, fiber type staining showed a predominant shift towards  
350 mitochondria rich type I fibers (Fig. S9e). Interestingly, in K320E<sup>msc</sup> mice regenerated fibers  
351 showed a mixed myosin heavy chain pattern after one week of regeneration. These data  
352 indicate that rapamycin can be used as a modulator of mitochondrial turnover which specifically  
353 purifies mutated mtDNA species, thus ameliorating mitochondrial dysfunction, albeit changing  
354 muscle fiber type composition.

355

### 356 **Discussion**

357 Autophagy and specifically mitophagy and its variants are well-established pathways for  
358 mitochondrial turnover, which is essential to maintain mitochondrial fitness <sup>4</sup>. Loss of  
359 mitochondrial quality control mechanisms, either by specific mutations of key players or by  
360 reduced autophagy activity, strikingly correlates with the acquirement of mtDNA mutations <sup>38</sup>.  
361 However, an exacerbated activation of mitophagy may lead to a serious reduction of the  
362 mitochondrial pool, thus affecting cellular energy supply <sup>39</sup>. Therefore, the fine-tuned regulation  
363 of mitochondrial quality control mechanisms is essential to maintain cellular energy  
364 homeostasis.

365 Although toxic substances can cause mitochondrial damage, the most prevalent reason is the  
366 accumulation of alterations in mtDNA due to replication errors. Mutations in genes encoding  
367 proteins involved in mtDNA replication, like the helicase Twinkle, and in mtDNA maintenance  
368 cause mutations leading to mitochondrial diseases, with brain and skeletal muscle being  
369 regularly affected. In addition, somatic mutations in mtDNA accumulate during the normal aging  
370 process in many organs in humans <sup>3</sup>, leading to a tissue mosaic where few cells with  
371 mitochondrial dysfunction, caused by high mutation loads, are embedded in normal tissue <sup>40</sup>.

372 In general, tissues most depending on mitochondrial function are most severely affected when  
373 carrying mtDNA mutations. Paradoxically, we found that expression of the dominant negative  
374 K320E mutation of Twinkle in extraocular muscle shows a remarkable differential vulnerability of  
375 muscle fiber types, with mitochondrial dysfunction especially affecting fibers with a glycolytic  
376 metabolism <sup>22</sup>. In agreement with these results, we found less mtDNA alterations in aged SOL,  
377 a muscle rich in type I fibers which mostly rely on mitochondrial ATP production, compared to  
378 the TA mostly composed of fast twitch, glycolytic fibers (Fig. 1). Noteworthy, different muscles  
379 rich in oxidative vs. glycolytic fibers show notable differences in the expression of genes  
380 involved in mitochondrial dynamics <sup>41</sup>, making oxidative muscles more resistant to ageing  
381 related dysfunction <sup>42</sup>. In fact, our data shows that SOL expressing K320E already has an  
382 increased flux in steady state but this was not related to increased mitochondrial turnover.  
383 Nevertheless, mitophagy, understood as the specific removal of the entire damaged organelle,  
384 does not provide the required selectivity to remove only mutated mtDNA. Hence, the existence  
385 of a specific turnover mechanism has been postulated, but not been proven yet <sup>43</sup>.

386 In contrast to terminally differentiated muscle of aged mice, proliferating cells in culture did not  
387 accumulate mtDNA alterations upon expression of K320E, instead this led to mtDNA depletion.  
388 Both K320E expression or mild treatment with EtBr induced the accumulation of mtDNA  
389 damage. EtBr intercalates between base pairs and slows down mtDNA replication. It is  
390 accepted that EtBr, when used at low concentration, also induces frame shift mutations and  
391 deletions<sup>44</sup> and we demonstrated that it also triggers oxidative damage in the mtDNA. Our data  
392 show that mtDNA depletion induced by damage is caused by a specific exacerbated mtDNA  
393 turnover which is Atg5 dependent and thus requires autophagosome formation and lysosomal  
394 degradation.

395 Interestingly, K320E localizes preferentially in specific mitochondrial regions. K320E  
396 localization does not overlap completely with the mitochondrial outer membrane protein TOM20

397 and is present in areas that are also not stained by Mitotracker Green, demonstrating that  
398 nucleoids containing Twinkle can be specifically localized in a unique mitochondrial  
399 subcompartment. Indeed, mtDNA has been shown to attach preferentially to cholesterol-rich  
400 membrane structures and Twinkle, as a nucleoid protein, has been found to be enriched in  
401 these areas as well <sup>45</sup>. The onion-like structures we observed in our cell model have been  
402 detected in the muscle of patients with mitochondrial myopathy caused by mtDNA mutations <sup>46</sup>  
403 and very recently also in  $\rho$ 0-cells lacking mtDNA <sup>47</sup>. Here we show that mtDNA damage induces  
404 cristae remodelling in poles of the mitochondrial network and that these structures containing  
405 Twinkle are delivered to lysosomal compartments, which are therefore specifically involved in  
406 mtDNA removal.

407 Three proteins present in three mitochondrial compartments are responsible for mtDNA  
408 distribution and selective turnover: Twinkle, in the mitochondrial matrix; ATAD3, in the  
409 mitochondrial inner membrane and SAMM50, in the mitochondrial outer membrane. Twinkle  
410 arises as the link between nucleoids and the inner membrane through interaction with ATAD3, a  
411 protein controlling several aspects of mitochondrial membrane dynamics <sup>48</sup>. Interestingly, the  
412 human ortholog ATAD3B has been recently found to be a mitophagy receptor for mtDNA  
413 damage induced by oxidative stress <sup>49</sup>. In the other side, SAMM50, which resides in the  
414 mitochondrial outer membrane, interacts with the MICOS complex, and organizes membrane  
415 architecture <sup>50</sup>. Interestingly, both ATAD3 and SAMM50 have been described as regulators of  
416 Pink1-Parkin as well <sup>34,51</sup>, thus providing the link between nucleoid localization and specific  
417 degradation of mtDNA.

418 Furthermore, we show that upon mtDNA damage, VPS35, an endosomal protein involved in  
419 mitochondrial quality control, increases contacts to mitochondrial subcompartments containing  
420 Twinkle. Interestingly, VPS35 deficient cells showed a persistent activation of mitophagy with  
421 mtDNA depletion. The fact that *Samm50* depletion induces mitophagy, but excludes mtDNA  
422 degradation <sup>34</sup>, suggests that SAMM50 confers the required selectivity and VPS35 the  
423 specificity to remove only fragments containing mtDNA.

424 Removal of mitochondrial fragments has been shown to take part through a specialized  
425 pathway called Mitochondrial Derived Vesicles (MDVs) <sup>7</sup>. Currently, only a few proteins have  
426 been found to determine cargo and vesicle fate. While MAPL generates vesicles which divert  
427 oxidized cargo to peroxisomes <sup>32</sup>, Tollip, an endosomal organizer, synchronizes Parkin-  
428 dependent MDVs directed to the lysosomal compartment <sup>8</sup>. Canonical MDVs are generated in  
429 the mitochondria in an Atg5 and LC3 independent manner <sup>32</sup>, however, mtDNA damage by  
430 K320E expression showed accumulation of LC3 autophagosomes and mtDNA depletion which  
431 is Atg5 dependent. Additionally, electron microscopic pictures of our cells never showed  
432 vesicles resembling MDVs, which are much smaller than the mitochondrial extrusions and  
433 autolysosomes containing Twinkle we observed. Furthermore, we unequivocally showed that  
434 Twinkle particles are directed to the lysosomal compartment and that VPS35 associates with  
435 mitochondria upon mtDNA damage. We also showed that VPS35 recruitment is SAMM50  
436 dependent and, upon mtDNA damage, such recruitment is specific to Twinkle containing

437 regions. Upon EtBr damage, we confirmed that VPS35 precipitates with mitochondrial outer  
438 membrane proteins, such as SAMM50, TOMM40, TIMMDC1 and VDAC1 and VDAC3 and it is  
439 in this environment when Twinkle, a mitochondrial matrix protein, interacts with SAMM50.  
440 mtDNA removal exemplifies a specialized mitophagy trail. Delivery of specific mitochondrial  
441 cargo to quality control pathways through VPS35 was previously shown to be highly regulated.  
442 If the selected cargo is diverted into peroxisomes, VPS35 associates with MDVs by interacting  
443 with MAPL in a Drp1 independent manner<sup>10</sup>. However, if the MDVs are directed to lysosomes  
444 the association is dependent on Drp1<sup>52</sup>. On the other hand, SAMM50 modifies mitochondrial  
445 structure by interacting with Drp1<sup>53</sup> and with the Pink1-Parkin machinery for selective  
446 mitophagy<sup>34</sup>. Hence, SAMM50 works as a platform where mitochondrial fission, membrane  
447 architecture, and mitophagy components orchestrate membrane protrusions and facilitate  
448 VPS35 recruitment. Very recently, SAMM50 has been linked also to piecemeal mitophagy,  
449 independent of MDVs, through direct interaction with the p62 adaptor<sup>54</sup>. Hence, we conclude  
450 that specific mtDNA degradation does not follow the MDV pathway, despite the fact that they  
451 share some components, and that it is more likely that mitochondrial protrusions containing  
452 nucleoids are engulfed in autophagosomes in a specialized mitophagy pathway.  
453 VPS35, which has been extensively linked to neurological diseases such as Parkinson's and  
454 Alzheimer disease, appears as a regulator of mtDNA quality control necessary to maintain  
455 mitochondrial intactness. Modulation of *VPS35* expression has been evaluated as a potential  
456 approach against Parkinson's disease<sup>55</sup> and, in *Drosophila*, *Vps35* overexpression can rescue  
457 an LRRK2-induced Parkinson's phenotype<sup>56</sup>. iPSC derived neurons from *LRKK2*-PD patients  
458 showed accumulation of mtDNA damage<sup>57</sup>. Nonetheless, the ability of VPS35 to eliminate such  
459 molecules in a human disease related model needs to be further explored as a potential  
460 therapeutic strategy.

461 Enrichment of Spg7 upon VPS35 IP in EtBr treated cells also suggests the involvement of  
462 mitochondrial proteases. Mitochondrial matrix proteases (mAAAs) represent a group of  
463 enzymes related to mitochondrial quality control and mitochondrial membrane remodeling upon  
464 proteolytic cleavage of Opa1 and Oma1. Spg7 has been found to copurify with Prohibitin  
465 participating in the formation of the permeability transition pore<sup>58,59</sup>. Mutations in the *SPG7*  
466 gene are the cause for Hereditary Spastic Paraplegia Type 7 but also a Progressive External  
467 Optalmoplegia-like syndrome with accumulation of mtDNA deletions<sup>60</sup>. Hence, it is tempting to  
468 propose that Spg7 works as a regulator of mtDNA turnover as well. However, further studies are  
469 needed to reveal its specific role and regulation of the process.

470 Finally, our data demonstrate that specific removal of mtDNA is linked to lysosomal activity.  
471 Lysosomal degradation of bulk autophagy is regulated by the serine-threonine protein kinase  
472 mTORC1 which resides on the lysosomal surface. mtDNA replication defects activate mTORC1  
473 and the integrated mitochondrial stress response in a cascade of effects with wide downstream  
474 consequences<sup>61</sup>. It is well known that mTORC1 activation inhibits autophagy by influencing  
475 both the formation of autophagosomes but also lysosomal acidification<sup>62</sup>. In order to prove the  
476 selectivity of this process *in vivo*, we used a mouse model where mtDNA alterations rapidly

477 accumulate and indeed, activation of the mTORC1 pathway by rapamycin was able to eliminate  
478 abnormal mtDNA molecules and thus reduces the accumulation of cells with mitochondrial  
479 dysfunction. Rapamycin has been described as a potential treatment against mitochondrial  
480 diseases<sup>18,63</sup>, however, since we observed a fiber-type shift, mTORC1 inhibition might activate  
481 other signalling pathways with undesirable effects. Nonetheless, by using Rapamycin we  
482 demonstrated that elimination of mutant mtDNA without affecting total mtDNA copy number is  
483 possible.

484 In conclusion, we unveil a new complex mechanism with physiological relevance for  
485 mitochondrial fitness. Twinkle mediates nucleoid binding to the mitochondrial inner membrane  
486 through ATAD3 interaction, which is responsible for nucleoid organization. SAMM50 provides  
487 the required specificity to eliminate mtDNA while VPS35 supplies the selectivity. Interestingly,  
488 mutations in *TWINK*, *ATAD3A* and *VPS35* have been linked to several severe mitochondrial  
489 diseases having in common mtDNA instability<sup>64-66</sup>, therefore representing a cluster of proteins  
490 involved in specific mtDNA turnover. Fine tuning the activity of such proteins could be used as a  
491 therapeutic strategy against mtDNA related diseases, either inherited, acquired or due to normal  
492 ageing.

493

## 494 **Methods**

495

### 496 ***In vivo* experimental approaches**

497 K320E transgenic mice were generated by crossing R26-K320EloxP/+ mice (point mutation  
498 K320E; Rosa26-Stop-construct; downstream EGFP) with mice expressing Cre recombinase  
499 under the control of the skeletal muscle-specific MLC1f- promoter or satellite cells Pax7-Cre<sup>ERT</sup>.  
500 All mice used for experiments were housed in a standard animal facility maintained at 23°C,  
501 12:12h light-dark cycle, with free access to water and standard rodent chow. Autophagy flux  
502 was tested by intraperitoneal injection of 50mg/kg chloroquine 4h prior euthanasia. All  
503 procedures and experimentation with mice were performed according to protocols approved by  
504 the local authority (LANUV, Landesamt für Natur, Umwelt und Verbraucherschutz NRW,  
505 approval number: 2019-A090). Activation of Pax7-Cre<sup>ERT</sup> promoter was performed by injecting  
506 daily, for 5 days, intraperitoneal 2mg tamoxifen dissolved in mygliol. For muscle regeneration  
507 experiments, 2 days after the last tamoxifen injection, mice were anesthetized with 2%Xylazin,  
508 10% Ketamine in NaCl 0.9% and 10µM Cardiotoxin (*Naja Pallida*, Latoxan) was injected inside  
509 the fascia. After 2 days of rest, 2mg/kg rapamycin dissolved in mygliol was injected  
510 intraperitoneally daily for 5 days. The day after the last injection, mice were treated as explained  
511 below.

512

### 513 **Molecular biology and vector generation**

514 *Twink* ORF was amplified from plasmids pJet2-Twinkle and pROSA-K320E<sup>67</sup> and cloned in  
515 pmCherry-N1. For retroviral vector generation, Twinkle and Twinkle-mCherry, ORF was  
516 amplified and subcloned into pLenti-CMV Puro DEST (Addgene #17452). All ORFs were

517 subcloned into pBabe-Puro vector, kindly provided by Dr. Bernhard Schermer, and verified by  
518 Sanger sequencing. pLX304-TWINKLE-APEX2 vector was kindly provided by Dr. Alice Ting. To  
519 generate *Mus musculus Twnk* vectors, *Homo sapiens TWNK* was replaced by *Twnk* ORF and  
520 subcloned into pBABE-Puro vector. Mitochondrial matrix APEX2 control vector (Addgene  
521 #72480) was also subcloned into pBABE-Puro. For generation of Tfam-GFP, total RNA from  
522 mouse liver was isolated and converted into cDNA using TRIzol (Thermo Fisher) and RevertAid  
523 First Strand cDNA Synthesis Kit (Thermo Fisher) using PolyT as feeder. *Tfam* cDNA was  
524 cloned into pEGFP-N1. Atad3 KD and Samm50 KD clones were generated by transducing  
525 MEFs with the vector pMKO1-GFP (Addgene #10676) containing a shRNA (Table M1). Empty  
526 vector and a scramble containing vector were used as a control. For CRISPR Cas9 KO  
527 generation two gRNA directed to exon 4 and exon 5 (Table M1) were cloned in pSpCas9 (BB)-  
528 2A-Puro V2.0 (Addgene #62988).

529

### 530 **Generation and culture of cell lines**

531 C2C12 cell line was purchased from ATTC and grown in DMEM 4.5 g/L Glucose + GlutaMax,  
532 20% FBS, 1x Pen/Strep. Immortalized mouse embryonic fibroblast Atg5WT and Atg5KO MEFs  
533<sup>68</sup> and immortalized MEFs line were maintained as described<sup>69</sup>. Stable cell lines were  
534 generated by transducing C2C12 cells or MEFs with pBABE-Puro retroviruses. Briefly,  $2.5 \times 10^6$   
535 HEK293 cells were plated in 10cm<sup>2</sup> dish transfected with pCL-ECO (5 µg) and pBABE-Puro (10  
536 µg) vectors using PEI (40 µl). After 48h and 72h, medium containing viruses was harvested,  
537 filtered through 45 µm, mixed with 8µg/ml Polybrene and added to 250.000 cells previously  
538 plated. 48h post transduction, positive clones were selected by adding Puromycin 2.5 µg/ml to  
539 the medium in C2C12 and 5µg/ml to MEFs, which was maintained during all the experiments.  
540 shRNA clones were generated by transducing MEFs with pMKO.1-GFP vectors. Prior to all  
541 experiments, transduction rate was verified to be higher than 99% of GFP expressing cells by  
542 Flow cytometry. For generation of Vps35 CRISPR Cas9 KO clones, MEFs were transiently  
543 transfected with the vector containing gRNA and selected with 3 µg/ml puromycin for 4 days.  
544 Single clones were plated independently using cloning cylinders, analyzed by western blotting.  
545 Genomic DNA was isolated from VPS35-negative cells and genomic DNA modification was  
546 verified by Sanger sequencing. Exon 4 and Exon 5 were amplified (Table M1) and cloned using  
547 pJET1.2 cloning kit (Thermo Fisher) before sequencing.

548 Transient transfection was achieved transfecting the corresponding plasmids using  
549 Lipofectamine 3000 following manufacturer instructions. Plasmids use in this work were: LC3-  
550 GFP (Addgene #21073), Lamp1-GFP (Addgene #34831), Fis1p-Cherry-GFP<sup>70</sup>, LC3-Fis1p-  
551 Cherry (kindly provided by Dr. Terje Johansen) and MAPL-GFP from CECAD Imaging Facility  
552<sup>32</sup>.

553 For mtDNA depletion experiments, cells were maintained as described before for 7 days but  
554 media was supplemented with 50 ng/ml Ethidium and 50 µg/ml Uridine. Lysosomal function was  
555 blocked using 10 µM Chloroquine for 24h.

556

557 **mtDNA amplification**

558 Total DNA was isolated using DNeasy Blood & Tissue Kit (Qiagen) according to manufacturer's  
559 instruction. 25 ng of total DNA was used for analysis of threshold amplification differences  
560 between mtDNA and nuclear DNA (delta C(t) method with specific primers (Table M1). Long  
561 range PCR was used to screen for the presence of mtDNA alterations. 14 Kb of mtDNA was  
562 amplified using Rabbit Bioscience Long Range kit with oligos described in table M1.

563

564 **Western blot and co-immunoprecipitation**

565 Cells pellets were lysed with RIPA-buffer (150 mM NaCl, 1% Triton-X1000, 0.1% SDS, 50 mM  
566 Tris-HCl pH 8, 0.5% Na-deoxycholate) containing protease inhibitor (Roche) and protein  
567 concentration measured using the Bradford assay. Proteins were transferred after  
568 electrophoresis to a PVDF-membrane previously activated with methanol. Membranes were  
569 blocked (5% milk in TBS-0.1% Tween-20) and incubated overnight with primary antibodies.  
570 Antibodies used in this work are: monoclonal  $\alpha$ -V5 (Abcam), polyclonal  $\alpha$ -V5 (Thermo  
571 Scientific), polyclonal  $\alpha$ -TOM20 and monoclonal  $\alpha$ -VPS35 (Santa Cruz), monoclonal and  
572 polyclonal  $\alpha$ -SAMM50 (Abnova and Abcam respectively), polyclonal  $\alpha$ -ATAD3, polyclonal  $\alpha$ -LC3  
573 and polyclonal  $\alpha$ -p62 (Proteintech), polyclonal GAPDH (Novus Biologicals). Secondary goat  
574 anti-mouse, goat anti-rabbit and goat anti-chicken HRP (Jackson Laboratory). Images were  
575 acquired using the ECL Advanced Chemiluminescence kit (GE Healthcare Life Sciences®, UK)  
576 according to manufacturer's protocols and visualized using a LAS500 CCD camera.

577 For immunoprecipitation, cells expressing Twinkle-APEX2-V5 were pelleted and solubilized in  
578 IP Buffer (500 mM HEPES KOH pH 7.2, 150 mM NaCl, 1 mM MgCl<sub>2</sub>, 1% Triton-X1000 and  
579 Protease inhibitor (Roche). 500  $\mu$ g of total protein extract were used to IP with either 2.5  $\mu$ g V5  
580 rabbit polyclonal antibody or VPS35 mouse monoclonal over night at 4°C and recovered after  
581 incubating for 6h at 4°C in a rotator with equilibrated Agarose Protein-G beads (Abcam).  
582 Immunoprecipitation followed by MS analysis was performed as described but using magnetic  
583 Protein G beads (Thermo Scientific). Samples were washed 5 times with washing buffer  
584 (10 mM HEPES KOH pH 7.2, 150 mM NaCl, 1 mM MgCl<sub>2</sub>, 0.2% Triton-X1000) and once with  
585 PBS. Prior to analysis by MS, samples were washed 3x with ammonium-bicarbonate (ABC)  
586 buffer, denatured with 50  $\mu$ l of urea buffer (6 M urea, 2 M thiourea) and followed by disulfide-  
587 bridge reduction using dithiothreitol (DTT) at a final concentration of 5 mM for 1 hour at room  
588 temperature. To alkylate oxidized cysteines, 2-Iodoacetamide (IAA) was added to the samples  
589 until a concentration of 40 mM was reached and incubated for 30 min in the dark. Lys-C was  
590 added in a ratio of 1:100 (0.1  $\mu$ g enzyme for 10  $\mu$ g protein) and incubated for 2-3 hours.  
591 Samples were finally diluted with ABC buffer to reach 2M urea concentration. Protein digestion  
592 was performed overnight with trypsin 1:100. Samples were acidified with 1% formic acid and  
593 desalted using a modified version of the previously described Stop and Go extraction tip  
594 (StageTip) protocol<sup>71</sup>.

595

596 **Pulsed SILAC labeling in mice and in-solution digestion**

597 For pulsed SILAC labeling mice, 30-40 weeks old mice for K320E; Mlc1 line (C57BL/6J) were  
598 fed a  $^{13}\text{C}_6$ -lysine (Lys6)-containing mouse diet (Silantes) for 14 days to monitor newly  
599 synthesized proteins by comparing the incorporation of Lys-6 with the naturally occurring Lys-0  
600  $^{72}$ . Mice were sacrificed at the end of day 14 and tissues dissected and snap-frozen in liquid  
601 nitrogen. Samples were grinded and proteins extracted and denatured by the addition of 4%  
602 SDS in PBS. To remove residual SDS proteins were precipitated overnight in 4x ice-cold  
603 acetone (v:v). On the next day after centrifugation at 16,000 g for 10 min the protein pellets  
604 were dissolved in urea buffer (6 M urea / 2 M thiourea). The following protein digestion was  
605 performed as described previously but instead of overnight tryptic digestion proteins were only  
606 digested with Lys-C (1:100 enzyme-to-protein ratio) for both pre-digestion (2h at RT) and  
607 overnight digestion after dilution of urea using ABC buffer.

608

### 609 **Liquid chromatography – mass spectrometric analysis**

610 Both affinity-enriched and pulsed SILAC proteomics samples were analyzed in positive mode  
611 using data-dependent acquisition (DDA) either by an Easy-nLC 1000 – Q Exactive Plus or an  
612 Easy-nLC 1200 – Orbitrap Eclipse tribrid system (all Thermo Fisher). On-line chromatography  
613 was directly coupled to the mass spectrometric systems using a nanoelectrospray ionization  
614 source. Peptides were separated by reversed-phase chromatography with a binary buffer  
615 system of buffer A (0.1% formic acid in water) and buffer B (0.1% formic acid in 80%  
616 acetonitrile) using a 60 min chromatographic gradient for IP samples and 120 min for pulsed  
617 SILAC samples. Separation was performed on a 50 cm long in-house packed analytical column  
618 filled with 1.9  $\mu\text{M}$  C18-AQ Reprosil Pur beads (Dr. Maisch). Using the 60 min chromatographic  
619 gradient peptide separation based on their hydrophobicity was performed by linearly increasing  
620 the amount of buffer B from initial 13% to 48% over 35 min followed by an increase of B to 95%  
621 for 10 min. The column was washed for 5 min and initial column conditions were achieved by  
622 equilibrating the column for 10 min at 7% B. Full MS spectra (300 to 1750 m/z) were acquired  
623 with a resolution of 70,000, a maximum injection time of 20 ms and an AGC target of  $3e6$ . The  
624 top 10 most abundant peptide ions were isolated (1.8 m/z isolation windows) for subsequent  
625 HCD fragmentation (NCE = 28) and MS/MS recording at a resolution of 35,000, a maximum  
626 injection time of 120 ms and an AGC target of  $5e5$ . Peptide ions selected for fragmentation  
627 were dynamically excluded for 20 seconds.

628 Using the 120 min chromatographic gradient peptides were separated by linearly increasing B  
629 from initial 4% to 25% over 96 min followed by an increase of B to 55% over 14 min. After a  
630 steep increase of B to 95% over 2 min the analytical column was washed for 8 min at 95% B.  
631 Full MS spectra (375 to 1500 m/z) were acquired with a resolution of 60,000, a dynamic  
632 injection time and an automated AGC target. The top 20 most abundant peptide ions (charge  
633 state 2 – 7) were isolated (1.2 m/z isolation windows) for subsequent HCD fragmentation (NCE  
634 = 30) and MS/MS recording at a resolution of 15,000, a maximum injection time of 22 ms and  
635 an automated AGC target. Peptide ions selected for fragmentation were dynamically excluded  
636 for 60 seconds.



637

### 638 **Data processing and analysis**

639 The mass spectrometry proteomics data have been deposited to the ProteomeXchange  
640 Consortium (<http://proteomecentral.proteomexchange.org>) via the PRIDE partner repository <sup>73</sup>  
641 with the dataset identifier PXD023939. All recorded RAW files were processed with the  
642 MaxQuant software suite (1.5.3.8 for IP data, 1.6.14 for pSILAC) <sup>74</sup>. For peptide identification  
643 and scoring MS/MS spectra were matched against the mouse Uniprot database (downloaded  
644 08/15/2019) using the Andromeda search algorithm <sup>75</sup>. For the affinity-enriched samples  
645 multiplicity was set to one and trypsin/P was selected as digestive enzyme.  
646 Carbamidomethylation was set as a fixed modification and methionine oxidation or N-terminal  
647 acetylation was selected as variable modification. Peptides were identified with a minimum  
648 amino acid length of seven and a false-discovery rate (FDR) cut-off of 1% on the peptide level.  
649 Proteins were identified with FDR < 1% using unique and razor peptides for quantification.  
650 Label-free quantification was performed using the standard settings of the maxLFQ algorithm.  
651 Match between runs was activated. pSILAC data were analyzed with the same settings with  
652 some modifications. Multiplicity was set to two with Lys6 as heavy isotope label. Lys-C/P was  
653 selected as digestive peptide and LFQ quantification was deactivated.

654 Statistical analysis and visualization were done with the Perseus (1.6.5) and InstantClue  
655 software suits <sup>76,77</sup>. LFQ intensities of the IP samples were log<sub>2</sub>-transformed and filtered for  
656 proteins identified in all replicates of at least one condition. Missing values were imputed by  
657 random drawing of values from 1.8 standard deviations (SD) downshifted, 0.3 SD broad normal  
658 distribution to simulate the lower detection limits of the mass spectrometer. To evaluate  
659 principal components responsible for the variances between samples we performed a principal  
660 component analysis. Further, we performed a two-sided Student's *t*-test to identify significantly  
661 regulated proteins. We proceeded similarly for the pulsed SILAC data but used the heavy-to-  
662 light (H/L) ratios for statistical testing. We used the same filtering-criteria but did not imputed  
663 missing values. We performed a 1D annotation enrichment to identify enriched categorical  
664 terms in the different conditions <sup>78</sup>.

665

### 666 **Histology, Immunofluorescence and Microscopy**

667 For tissue histology, mice were sacrificed by cervical dislocation, muscles dissected, mounted in  
668 cork with OCT (Tissue-Tek), snap frozen in isopentane and stored at -80°C till needed. 10 µm  
669 thick sections covering the injured area were produced using a cryostat maintained at -20°C  
670 (Leica CM 3050s, Techno-med). To assess the integrity of mitochondrial function the sections  
671 were sequentially stained for COX and SDH activities. Frozen sections were incubated 20 mins  
672 at 37°C in COX solution (20 mg/ml catalase, 74 mg/ml sucrose, 2 mg/ml cytochrome c, and  
673 1mg/ml DAB in 50mM Na<sub>2</sub>HPO<sub>4</sub> pH 7.4). After 3 PBS washes, sections were then incubated for  
674 30 min at 37°C in SDH staining solution (2 mg/ml NBT, 0.2M Sodium succinate, 50mM MgCl<sub>2</sub>,  
675 50mM Tris-HCl, pH 7.4), washed 3 times with milliQ water, and mounted in Glycerol gelatin  
676 medium (Sigma).

677 For immunofluorescence of autophagy markers LC3 and p62 and mitochondrial TOM20, mice  
678 were perfused with PFA 4% in PBS prior to muscle collection. Samples were equilibrated in  
679 15% sucrose for 6h and 30% sucrose overnight before frozen in OCT medium. For LC3 IF,  
680 samples were preincubated with 0.1% SDS for 5min. Antibody specificity was determined in  
681 muscle sections from LC3-GFP transgenic mice (kindly provided by Dr. Evangelos Kondilis).  
682 Cryosections were blocked for 1h with 1% Western blocking reagent (Roche) containing 0.1%  
683 Triton in PBST, antibodies incubated overnight at 4°C and secondary antibodies at room  
684 temperature for 1h in blocking buffer. Samples were mounted in Fluoromount G containing  
685 DAPI. Fiber type staining was performed as described previously<sup>26</sup>. Images were obtained with  
686 Leica SP8 with 63x/1.40 oil PL Apo objective.

687 For *in vitro* analysis, cells were fixed in 4% PFA/PBS, permeabilized with PBS-0.2% Triton-  
688 X1000 for 30 min and blocked for 1 hour at RT in blocking buffer (5% fat free milk powder, 10%  
689 FBS, 1% BSA, 0.1% Triton-X100 in PBS). Primary antibodies were incubated in blocking buffer  
690 over night at 4°C and secondary antibodies for 1 hour at RT. mtDNA replication rate was  
691 determined by pulse BrdU labelling. Briefly, cells were incubated with 20 µM BrdU (Sigma) for  
692 6h, fixed with 4% PFA/PBS for 30 minutes and directly permeabilize with 0.5% Triton X-100 on  
693 ice for 5 min. To allow access to mtDNA, cells were incubated with HCl 2N for another 30 min  
694 prior to immunofluorescence. Coverslips were mounted using DAPI-Fluoromount G. Images  
695 were acquired using a spinning-disk confocal microscope (Ultra View VoX; PerkinElmer) with a  
696 Plan-Apochromat total internal reflection fluorescence 60Å-/1.49 NA oil DIC objective, Leica  
697 SP5 microscope controlled by Las AF 3 with 2.5x extra magnification and Leica SP8 with  
698 63x/1.40 oil PL Apo objective. Microscopy Live imaging was performed in spinning-disk confocal  
699 microscope (Ultra View VoX; PerkinElmer). Cells were seeded onto glass plates and loaded  
700 with 500nM Mitotracker green for 30 minutes. Videos were recorded taking 1 picture/min at  
701 37°C and 5% CO<sub>2</sub>.

702 Antibodies used for immunofluorescence were: rabbit polyclonal α-V5 (Thermo); rabbit  
703 polyclonal α-TOM20, mouse monoclonal α-Vsp35 and mouse monoclonal α-8-OHdG (Santa  
704 Cruz); goat polyclonal α-Vsp35 and mouse monoclonal α-dsDNA (Abcam); rabbit polyclonal α-  
705 ATAD3, rabbit polyclonal α-LC3, rabbit polyclonal α-p62, rabbit polyclonal LRPPRC  
706 (Proteintech); and monoclonal α-BrdU (BD Bioscience). Fluorescence secondary antibodies  
707 goat α-mouse, α-rabbit Alexa Fluor-488, 555 and 647 and rabbit α-goat-647 were used  
708 accordingly to the primary antibodies. Additionally, α-mouse IgM Alexa Fluor 488, α-mouse IgG  
709 Alexa Fluor 555 and α-mouse IgG2b Alexa Fluor 647 were used for fiber type triple staining.

710

### 711 **Electron microscopy**

712 For electron microscope cells were grown on small discs of aclar foil and fixed for 1 h in 2%  
713 Glutaraldehyde with 2 %Sucrose in HEPES buffer pH 7.4. After washing two times with 0.1M  
714 Cacodylate buffer, free aldehyde groups were quenched with 0.1M Glycin in 0.1M Cacodylate  
715 buffer for two times 20 min. After a short wash with 0.1M Cacodylate buffer, cells were  
716 incubated in 0.5mg/ml Diaminobenzidine in 0.1M Cacodylate buffer and, after 10 min, a final

717 concentration of 0.03% H<sub>2</sub>O<sub>2</sub> added and incubated for 30min. Finally, cells were washed three  
718 times with 0.1M Cacodylate buffer and incubated with 1% Osmiumtetroxid and 1.5% Potassium  
719 hexacyanoferrat for 30 min at 4°C. After 3x5min wash with ddH<sub>2</sub>O, samples were dehydrated  
720 using ascending ethanol series (50%, 70%, 90%, 100%) for 5 min each and infiltrated with a  
721 mixture of 50% Epon/ethanol overnight at 4°C and with pure Epon for two times 2 h. Samples  
722 were embedded into TAAB capsules and cured for 48 h at 60°C.

723 For electron tomography Ultrathin sections of 200 nm were cut using an ultramicrotome (Leica,  
724 UC7) and incubated with 10 nm protein A gold (CMC, Utrecht) diluted 1:25 in ddH<sub>2</sub>O. Sections  
725 were stained with 2% Uranyl acetate for 20 min and Reynolds lead citrate solution for 3 min.  
726 Images and Tilt series for 1nm thickness were acquired from -65° to 65° with 1° increment on a  
727 JEM-2100 Plus Transmission Electron Microscope (JEOL) operating at 200kV equipped with a  
728 OneView 4K 32 bit (Gatan) using SerialEM (Mastronarde, 2005). Reconstruction was done  
729 using Imod (Kremer et al.,1996).

730

### 731 **Image analysis**

732 All image analysis was performed in FIJI (NIH, Bethesda). LC3 and p62 puncta quantification  
733 were performed with the “counting cells” internal plugin for particles bigger than 2 pixels to  
734 exclude background. mtDNA foci quantification, VPS35-Twinkle analysis, 8-OHdG and BrdU  
735 analysis were performed with a self-created macro. Briefly, threshold was set for the different  
736 channels. Nuclear signal was selected and removed for the analysis. The signal corresponding  
737 to the mitochondrial network was selected and only the particles from the other channel bigger  
738 than 1 pixel inside the mitochondrial network were considered to the analysis. For VPS35, the  
739 minimum size was determined to be 3 pixels. After thresholding, all VPS35 particles were  
740 summarized and the ones in contact with Twinkle or LRPPRC were used to get a percentage.  
741 Manders’ coefficient was obtained using JaCOP plugin. (Bolte & Cordelieres, 2006).

742

743 **Table M1. Oligonucleotides used in this study.**

| shRNA name          | Sequence 5´-3´                                              |
|---------------------|-------------------------------------------------------------|
| shAtad3_1           | AGCCTGTATAGGAACGTTCTTCTCGAGGAACGTTCTATACAGGCTTT<br>TTTTTG   |
| shAtad3_2           | GCCTGTATAGGAACGTTCTTCTCGAGAGAACGTTCTATACAGGCTT<br>TTTTTG    |
| shAtad3_3           | GCAGTTTGATTGGGCTATCTTCTCGAGGATAGCCCAATCAAAGCTGCTT<br>TTTTTG |
| shScramble          | CCTAAGGTTAAGTCGCCCTCGCTCGAGCGAGGGCGACTTAACCTTAG<br>GTTTTTG  |
| shSamm50            | GAGGAGATGTGAGCTTCATTTCAAGAGAATGAAGCTCACATCTCCTCT<br>TTTTTG  |
| mVps35-ex4-104fw-s  | CACCGTATGAACTTGACAGTACGC                                    |
| mVps35-ex4-104fw-as | AAACGCGTACTGTACAAGTTCATAC                                   |
| mVps35-ex5-91fw-s   | CACCGATTTGGTAGAAATGTGCCG                                    |

|                       |                          |
|-----------------------|--------------------------|
| mVps35-ex5-91fw-as    | AAACCGGCACATTTCTACCAAATC |
| mtDNA qPCR Forward    | CCTATCACCCCTTGCCATCAT    |
| mtDNA qPCR Reverse    | GAGGCTGTTGCTTGTGTGAC     |
| nucDNA qPCR Forward   | ATGGAAAGCCTGCCATCATG     |
| nucDNA qPCR Reverse   | TCCTTGTTGTTCCAGCATCAC    |
| mitoLongRange Forward | GTTCAACGATTAAGTCCTACGT   |
| mitoLongRange Reverse | GTTGTTTGATCCTGTTTCGTG    |
| Del983-4977 Forward   | TCGTAACAAGGTAAGCATACTG   |
| Del983-4977 Reverse   | CTCGCGGACTAGTATATCCT     |
| Vps35_Ex4 Forward     | CTGAGCCAGGAGATCATGAATTC  |
| Vps35_Ex4 Reverse     | GCTTCCACTACTGAGCTAGATCAC |
| Vps35_Ex5 Forward     | GTCTAGACACAACCTACTGACACC |
| Vps35_Ex5 Reverse     | GTAGTGTGTTTGAATACAGTCAAG |

744

#### 745 **Acknowledgements**

746 We are thankful to CECAD Imaging and proteomics facilities for excellent technical support. We  
747 thank Nadine Niehoff and Katrin Lanz for technical assistance. We are grateful to Thomas Paß  
748 for critical review and discussion of the results. This work was supported by grants from the  
749 Deutsche Forschungs-gemeinschaft (PL 895/1-1) and Köln Fortune (341/2019) to DPM and  
750 RJW.

751

#### 752 **Author contributions**

753 Funding Acquisition, DPM and RJW; Conceptualization, DPM and RJW; Investigation and  
754 Formal Analysis, DPM, AS, SK, KM, JH; Resources JN; Analysis of MS Data, SK; Visualization,  
755 DPM; Writing, DPM and RJW; Writing-Review & Edit, DPM, RJW, SK, MK; Supervision, DPM  
756 and MK.

757

#### 758 **Conflict of interest**

759 The authors declare that they have no conflict of interest.

760

#### 761 **References**

- 762 1 Samuels, D. C. *et al.* Recurrent tissue-specific mtDNA mutations are common in  
763 humans. *PLoS Genet* **9**, e1003929, doi:10.1371/journal.pgen.1003929 (2013).
- 764 2 Lopez-Otin, C., Blasco, M. A., Partridge, L., Serrano, M. & Kroemer, G. The  
765 hallmarks of aging. *Cell* **153**, 1194-1217, doi:10.1016/j.cell.2013.05.039 (2013).
- 766 3 Stewart, J. B. & Chinnery, P. F. Extreme heterogeneity of human mitochondrial  
767 DNA from organelles to populations. *Nat Rev Genet*, doi:10.1038/s41576-020-  
768 00284-x (2020).
- 769 4 Pickles, S., Vigie, P. & Youle, R. J. Mitophagy and Quality Control Mechanisms in  
770 Mitochondrial Maintenance. *Curr Biol* **28**, R170-R185,  
771 doi:10.1016/j.cub.2018.01.004 (2018).

- 772 5 Chen, H. C. *et al.* Mitochondrial Fusion Is Required for mtDNA Stability in  
773 Skeletal Muscle and Tolerance of mtDNA Mutations. *Cell* **141**, 280-289,  
774 doi:10.1016/j.cell.2010.02.026 (2010).
- 775 6 Silva Ramos, E. *et al.* Mitochondrial fusion is required for regulation of  
776 mitochondrial DNA replication. *PLoS Genet* **15**, e1008085,  
777 doi:10.1371/journal.pgen.1008085 (2019).
- 778 7 Sugiura, A., McLelland, G. L., Fon, E. A. & McBride, H. M. A new pathway for  
779 mitochondrial quality control: mitochondrial-derived vesicles. *EMBO J* **33**, 2142-  
780 2156, doi:10.15252/embj.201488104 (2014).
- 781 8 Ryan, T. A. *et al.* Tollip coordinates Parkin-dependent trafficking of  
782 mitochondrial-derived vesicles. *Embo Journal*, doi:ARTN  
783 e10253910.15252/embj.2019102539 (2020).
- 784 9 McLelland, G. L., Soubannier, V., Chen, C. X., McBride, H. M. & Fon, E. A. Parkin  
785 and PINK1 function in a vesicular trafficking pathway regulating mitochondrial  
786 quality control. *EMBO J* **33**, 282-295, doi:10.1002/embj.201385902 (2014).
- 787 10 Braschi, E. *et al.* Vps35 Mediates Vesicle Transport between the Mitochondria  
788 and Peroxisomes. *Current Biology* **20**, 1310-1315,  
789 doi:10.1016/j.cub.2010.05.066 (2010).
- 790 11 Williams, E. T. *et al.* Parkin mediates the ubiquitination of VPS35 and modulates  
791 retromer-dependent endosomal sorting. *Human Molecular Genetics* **27**, 3189-  
792 3205, doi:10.1093/hmg/ddy224 (2018).
- 793 12 Soubannier, V. *et al.* A vesicular transport pathway shuttles cargo from  
794 mitochondria to lysosomes. *Curr Biol* **22**, 135-141,  
795 doi:10.1016/j.cub.2011.11.057 (2012).
- 796 13 Hanss, Z. *et al.* Mitochondrial and Clearance Impairment in p.D620N VPS35  
797 Patient-Derived Neurons. *Mov Disord*, doi:10.1002/mds.28365 (2020).
- 798 14 Neuhaus, J. F. *et al.* Catecholamine metabolism drives generation of  
799 mitochondrial DNA deletions in dopaminergic neurons. *Brain* **137**, 354-365,  
800 doi:10.1093/brain/awt291 (2014).
- 801 15 Dolle, C. *et al.* Defective mitochondrial DNA homeostasis in the substantia nigra  
802 in Parkinson disease. *Nat Commun* **7**, 13548, doi:10.1038/ncomms13548  
803 (2016).
- 804 16 Peter, B. & Falkenberg, M. TWINKLE and Other Human Mitochondrial DNA  
805 Helicases: Structure, Function and Disease. *Genes (Basel)* **11**,  
806 doi:10.3390/genes11040408 (2020).
- 807 17 Bove, J., Martinez-Vicente, M. & Vila, M. Fighting neurodegeneration with  
808 rapamycin: mechanistic insights. *Nature Reviews Neuroscience* **12**, 437-452,  
809 doi:10.1038/nrn3068 (2011).
- 810 18 Civiletto, G. *et al.* Rapamycin rescues mitochondrial myopathy via coordinated  
811 activation of autophagy and lysosomal biogenesis. *EMBO Mol Med* **10**,  
812 doi:10.15252/emmm.201708799 (2018).
- 813 19 Barriocanal-Casado, E. *et al.* Rapamycin administration is not a valid  
814 therapeutic strategy for every case of mitochondrial disease. *Ebiomedicine* **42**,  
815 511-523, doi:10.1016/j.ebiom.2019.03.025 (2019).
- 816 20 Tynnismaa, H. *et al.* Mutant mitochondrial helicase Twinkle causes multiple  
817 mtDNA deletions and a late-onset mitochondrial disease in mice. *Proc Natl*  
818 *Acad Sci U S A* **102**, 17687-17692, doi:10.1073/pnas.0505551102 (2005).

- 819 21 Baris, O. R. *et al.* The mitochondrial electron transport chain is dispensable for  
820 proliferation and differentiation of epidermal progenitor cells. *Stem Cells* **29**,  
821 1459-1468, doi:10.1002/stem.695 (2011).
- 822 22 Oexner, R. R. *et al.* Extraocular Muscle Reveals Selective Vulnerability of Type  
823 IIB Fibers to Respiratory Chain Defects Induced by Mitochondrial DNA  
824 Alterations. *Invest Ophthalmol Vis Sci* **61**, 14, doi:10.1167/iovs.61.12.14 (2020).
- 825 23 Weiland, D. *et al.* Imbalance of Mitochondrial Respiratory Chain Complexes in  
826 the Epidermis Induces Severe Skin Inflammation. *J Invest Dermatol* **138**, 132-  
827 140, doi:10.1016/j.jid.2017.08.019 (2018).
- 828 24 Holzer, T. *et al.* Respiratory chain inactivation links cartilage-mediated growth  
829 retardation to mitochondrial diseases. *J Cell Biol* **218**, 1853-1870,  
830 doi:10.1083/jcb.201809056 (2019).
- 831 25 Basu, S. *et al.* Accurate mapping of mitochondrial DNA deletions and  
832 duplications using deep sequencing. *PLoS Genet* **16**, e1009242,  
833 doi:10.1371/journal.pgen.1009242 (2020).
- 834 26 Kallabis, S. *et al.* High-throughput proteomics fiber typing (ProFIT) for  
835 comprehensive characterization of single skeletal muscle fibers. *Skelet Muscle*  
836 **10**, 7, doi:10.1186/s13395-020-00226-5 (2020).
- 837 27 Goffart, S. *et al.* Twinkle mutations associated with autosomal dominant  
838 progressive external ophthalmoplegia lead to impaired helicase function and in  
839 vivo mtDNA replication stalling. *Hum Mol Genet* **18**, 328-340,  
840 doi:10.1093/hmg/ddn359 (2009).
- 841 28 Ock, C. Y. *et al.* 8-Hydroxydeoxyguanosine: not mere biomarker for oxidative  
842 stress, but remedy for oxidative stress-implicated gastrointestinal diseases.  
843 *World J Gastroenterol* **18**, 302-308, doi:10.3748/wjg.v18.i4.302 (2012).
- 844 29 Mai, S., Muster, B., Bereiter-Hahn, J. & Jendrach, M. Autophagy proteins LC3B,  
845 ATG5 and ATG12 participate in quality control after mitochondrial damage and  
846 influence lifespan. *Autophagy* **8**, 47-62, doi:10.4161/auto.8.1.18174 (2012).
- 847 30 Kleele, T. *et al.* Distinct fission signatures predict mitochondrial degradation or  
848 biogenesis. *Nature* **593**, 435-439, doi:10.1038/s41586-021-03510-6 (2021).
- 849 31 He, J. Y. *et al.* The AAA(+) protein ATAD3 has displacement loop binding  
850 properties and is involved in mitochondrial nucleoid organization. *Journal of*  
851 *Cell Biology* **176**, 141-146, doi:10.1083/jcb.200609158 (2007).
- 852 32 Neuspiel, M. *et al.* Cargo-selected transport from the mitochondria to  
853 peroxisomes is mediated by vesicular carriers. *Current Biology* **18**, 102-108,  
854 doi:10.1016/j.cub.2007.12.038 (2008).
- 855 33 Ott, C. *et al.* Sam50 Functions in Mitochondrial Intermembrane Space Bridging  
856 and Biogenesis of Respiratory Complexes. *Molecular and Cellular Biology* **32**,  
857 1173-1188, doi:10.1128/Mcb.06388-11 (2012).
- 858 34 Jian, F. *et al.* Sam50 Regulates PINK1-Parkin-Mediated Mitophagy by  
859 Controlling PINK1 Stability and Mitochondrial Morphology. *Cell Rep* **23**, 2989-  
860 3005, doi:10.1016/j.celrep.2018.05.015 (2018).
- 861 35 Sage-Schwaede, A. *et al.* Exploring mTOR inhibition as treatment for  
862 mitochondrial disease. *Annals of Clinical and Translational Neurology* **6**, 1877-  
863 1881, doi:10.1002/acn3.50846 (2019).

- 864 36 Dai, Y. *et al.* Rapamycin drives selection against a pathogenic heteroplasmic  
865 mitochondrial DNA mutation. *Human Molecular Genetics* **23**, 637-647,  
866 doi:10.1093/hmg/ddt450 (2014).
- 867 37 Kandul, N. P., Zhang, T., Hay, B. A. & Guo, M. Selective removal of deletion-  
868 bearing mitochondrial DNA in heteroplasmic *Drosophila*. *Nat Commun* **7**,  
869 13100, doi:10.1038/ncomms13100 (2016).
- 870 38 Szczepanowska, K. & Trifunovic, A. in *The Human Mitochondrial Genome* (eds  
871 Giuseppe Gasparre & Anna Maria Porcelli) 221-242 (Academic Press, 2020).
- 872 39 Alsina, D. *et al.* FBXL4 deficiency increases mitochondrial removal by  
873 autophagy. *EMBO Mol Med* **12**, e11659, doi:10.15252/emmm.201911659  
874 (2020).
- 875 40 Larsson, N. G. Somatic mitochondrial DNA mutations in mammalian aging.  
876 *Annu Rev Biochem* **79**, 683-706, doi:10.1146/annurev-biochem-060408-093701  
877 (2010).
- 878 41 Mishra, P., Varuzhanyan, G., Pham, A. H. & Chan, D. C. Mitochondrial Dynamics  
879 Is a Distinguishing Feature of Skeletal Muscle Fiber Types and Regulates  
880 Organellar Compartmentalization. *Cell Metabolism* **22**, 1033-1044,  
881 doi:10.1016/j.cmet.2015.09.027 (2015).
- 882 42 Crupi, A. N. *et al.* Oxidative muscles have better mitochondrial homeostasis  
883 than glycolytic muscles throughout life and maintain mitochondrial function  
884 during aging. *Aging-Us* **10**, 3327-3352, doi:10.18632/aging.101643 (2018).
- 885 43 Yang, X., Zhang, R., Nakahira, K. & Gu, Z. Mitochondrial DNA Mutation,  
886 Diseases, and Nutrient-Regulated Mitophagy. *Annu Rev Nutr* **39**, 201-226,  
887 doi:10.1146/annurev-nutr-082018-124643 (2019).
- 888 44 Yielding, L. W., Brown, B. R., Graves, D. E. & Yielding, K. L. Ethidium-Bromide  
889 Enhancement of Frameshift Mutagenesis Caused by Photoactivatable Ethidium  
890 Analogs. *Mutation Research* **63**, 225-232, doi:Doi 10.1016/0027-  
891 5107(79)90055-1 (1979).
- 892 45 Gerhold, J. M. *et al.* Human Mitochondrial DNA-Protein Complexes Attach to a  
893 Cholesterol-Rich Membrane Structure (vol 5, 15292, 2015). *Scientific Reports* **5**,  
894 doi:ARTN 17119  
895 10.1038/srep17119 (2015).
- 896 46 Vincent, A. E. *et al.* The Spectrum of Mitochondrial Ultrastructural Defects in  
897 Mitochondrial Myopathy. *Scientific Reports* **6**, doi:ARTN 30610  
898 10.1038/srep30610 (2016).
- 899 47 Hu, C. *et al.* OPA1 and MICOS Regulate mitochondrial crista dynamics and  
900 formation. *Cell Death Dis* **11**, 940, doi:10.1038/s41419-020-03152-y (2020).
- 901 48 Peralta, S. *et al.* ATAD3 controls mitochondrial cristae structure in mouse  
902 muscle, influencing mtDNA replication and cholesterol levels. *J Cell Sci* **131**,  
903 doi:10.1242/jcs.217075 (2018).
- 904 49 Shu, L. *et al.* ATAD3B is a mitophagy receptor mediating clearance of oxidative  
905 stress-induced damaged mitochondrial DNA. *EMBO J* **40**, e106283,  
906 doi:10.15252/emj.2020106283 (2021).
- 907 50 Tang, J. H. *et al.* Sam50-Mic19-Mic60 axis determines mitochondrial cristae  
908 architecture by mediating mitochondrial outer and inner membrane contact.  
909 *Cell Death and Differentiation* **27**, 146-160, doi:10.1038/s41418-019-0345-2  
910 (2020).

- 911 51 Jin, G. *et al.* Atad3a suppresses Pink1-dependent mitophagy to maintain  
912 homeostasis of hematopoietic progenitor cells. *Nat Immunol* **19**, 29-40,  
913 doi:10.1038/s41590-017-0002-1 (2018).
- 914 52 Wang, W. *et al.* Parkinson's disease-associated mutant VPS35 causes  
915 mitochondrial dysfunction by recycling DLP1 complexes. *Nat Med* **22**, 54-63,  
916 doi:10.1038/nm.3983 (2016).
- 917 53 Liu, S. *et al.* SAMM50 Affects Mitochondrial Morphology through the  
918 Association of Drp1 in Mammalian Cells. *Febs Letters* **590**, 1313-1323,  
919 doi:10.1002/1873-3468.12170 (2016).
- 920 54 Abudu, Y. P. *et al.* SAMM50 acts with p62 in piecemeal basal- and OXPHOS-  
921 induced mitophagy of SAM and MICOS components. *J Cell Biol* **220**,  
922 doi:10.1083/jcb.202009092 (2021).
- 923 55 Eleuteri, S. & Albanese, A. VPS35-Based Approach: A Potential Innovative  
924 Treatment in Parkinson's Disease. *Front Neurol* **10**, 1272,  
925 doi:10.3389/fneur.2019.01272 (2019).
- 926 56 Linhart, R. *et al.* Vacuolar protein sorting 35 (Vps35) rescues locomotor deficits  
927 and shortened lifespan in *Drosophila* expressing a Parkinson's disease mutant  
928 of Leucine-rich repeat kinase 2 (LRRK2). *Molecular Neurodegeneration* **9**,  
929 doi:Artn 2310.1186/1750-1326-9-23 (2014).
- 930 57 Sanders, L. H. *et al.* LRRK2 mutations cause mitochondrial DNA damage in iPSC-  
931 derived neural cells from Parkinson's disease patients: Reversal by gene  
932 correction. *Neurobiology of Disease* **62**, 381-386,  
933 doi:10.1016/j.nbd.2013.10.013 (2014).
- 934 58 Shanmughapriya, S. *et al.* SPG7 is an Essential and Conserved Component of  
935 the Mitochondrial Permeability transition Pore. *Biophysical Journal* **110**, 309a-  
936 310a, doi:DOI 10.1016/j.bpj.2015.11.1663 (2016).
- 937 59 Sambri, I. *et al.* Impaired flickering of the permeability transition pore causes  
938 SPG7 spastic paraplegia. *Ebiomedicine* **61**, doi:ARTN  
939 10305010.1016/j.ebiom.2020.103050 (2020).
- 940 60 Pfeffer, G. *et al.* Mutations in the SPG7 gene cause chronic progressive external  
941 ophthalmoplegia through disordered mitochondrial DNA maintenance. *Brain*  
942 **137**, 1323-1336, doi:10.1093/brain/awu060 (2014).
- 943 61 Khan, N. A. *et al.* mTORC1 Regulates Mitochondrial Integrated Stress Response  
944 and Mitochondrial Myopathy Progression. *Cell Metabolism* **26**, 419+,  
945 doi:10.1016/j.cmet.2017.07.007 (2017).
- 946 62 Dossou, A. S. & Basu, A. The Emerging Roles of mTORC1 in Macromanaging  
947 Autophagy. *Cancers* **11**, doi:ARTN 142210.3390/cancers11101422 (2019).
- 948 63 Ding, Y. *et al.* Rapamycin Ameliorates Cognitive Impairments and Alzheimer's  
949 Disease-Like Pathology with Restoring Mitochondrial Abnormality in the  
950 Hippocampus of Streptozotocin-Induced Diabetic Mice. *Neurochem Res*,  
951 doi:10.1007/s11064-020-03160-6 (2020).
- 952 64 Desai, R. *et al.* ATAD3 gene cluster deletions cause cerebellar dysfunction  
953 associated with altered mitochondrial DNA and cholesterol metabolism. *Brain*  
954 **140**, 1595-1610, doi:10.1093/brain/awx094 (2017).
- 955 65 Deutschlander, A., Ross, O. A. & Wszolek, Z. K. in *GeneReviews((R))* (eds M. P.  
956 Adam *et al.*) (1993).



- 957 66 Remtulla, S., Emilie Nguyen, C. T., Prasad, C. & Campbell, C. Twinkle-Associated  
958 Mitochondrial DNA Depletion. *Pediatr Neurol* **90**, 61-65,  
959 doi:10.1016/j.pediatrneurol.2018.08.007 (2019).
- 960 67 Baris, O. R. *et al.* Mosaic Deficiency in Mitochondrial Oxidative Metabolism  
961 Promotes Cardiac Arrhythmia during Aging. *Cell Metab* **21**, 667-677,  
962 doi:10.1016/j.cmet.2015.04.005 (2015).
- 963 68 Nuchel, J. *et al.* TGFB1 is secreted through an unconventional pathway  
964 dependent on the autophagic machinery and cytoskeletal regulators.  
965 *Autophagy* **14**, 465-486, doi:10.1080/15548627.2017.1422850 (2018).
- 966 69 Gao, J. *et al.* CLUH regulates mitochondrial biogenesis by binding mRNAs of  
967 nuclear-encoded mitochondrial proteins. *J Cell Biol* **207**, 213-223,  
968 doi:10.1083/jcb.201403129 (2014).
- 969 70 Allen, G. F. G., Toth, R., James, J. & Ganley, I. G. Loss of iron triggers  
970 PINK1/Parkin-independent mitophagy. *Embo Reports* **14**, 1127-1135,  
971 doi:10.1038/embor.2013.168 (2013).
- 972 71 Rappsilber, J., Ishihama, Y. & Mann, M. Stop and go extraction tips for matrix-  
973 assisted laser desorption/ionization, nanoelectrospray, and LC/MS sample  
974 pretreatment in proteomics. *Anal Chem* **75**, 663-670, doi:10.1021/ac026117i  
975 (2003).
- 976 72 Kruger, M. *et al.* SILAC mouse for quantitative proteomics uncovers kindlin-3 as  
977 an essential factor for red blood cell function. *Cell* **134**, 353-364,  
978 doi:10.1016/j.cell.2008.05.033 (2008).
- 979 73 Perez-Riverol, Y. *et al.* The PRIDE database and related tools and resources in  
980 2019: improving support for quantification data. *Nucleic Acids Res* **47**, D442-  
981 D450, doi:10.1093/nar/gky1106 (2019).
- 982 74 Cox, J. & Mann, M. MaxQuant enables high peptide identification rates,  
983 individualized p.p.b.-range mass accuracies and proteome-wide protein  
984 quantification. *Nat Biotechnol* **26**, 1367-1372, doi:10.1038/nbt.1511 (2008).
- 985 75 Cox, J. *et al.* Andromeda: A Peptide Search Engine Integrated into the  
986 MaxQuant Environment. *Journal of Proteome Research* **10**, 1794-1805,  
987 doi:10.1021/pr101065j (2011).
- 988 76 Nolte, H., MacVicar, T. D., Tellkamp, F. & Kruger, M. Instant Clue: A Software  
989 Suite for Interactive Data Visualization and Analysis. *Sci Rep* **8**, 12648,  
990 doi:10.1038/s41598-018-31154-6 (2018).
- 991 77 Tyanova, S. *et al.* The Perseus computational platform for comprehensive  
992 analysis of (prote)omics data. *Nat Methods* **13**, 731-740,  
993 doi:10.1038/nmeth.3901 (2016).
- 994 78 Cox, J. & Mann, M. 1D and 2D annotation enrichment: a statistical method  
995 integrating quantitative proteomics with complementary high-throughput data.  
996 *BMC Bioinformatics* **13 Suppl 16**, S12, doi:10.1186/1471-2105-13-S16-S12  
997 (2012).
- 998

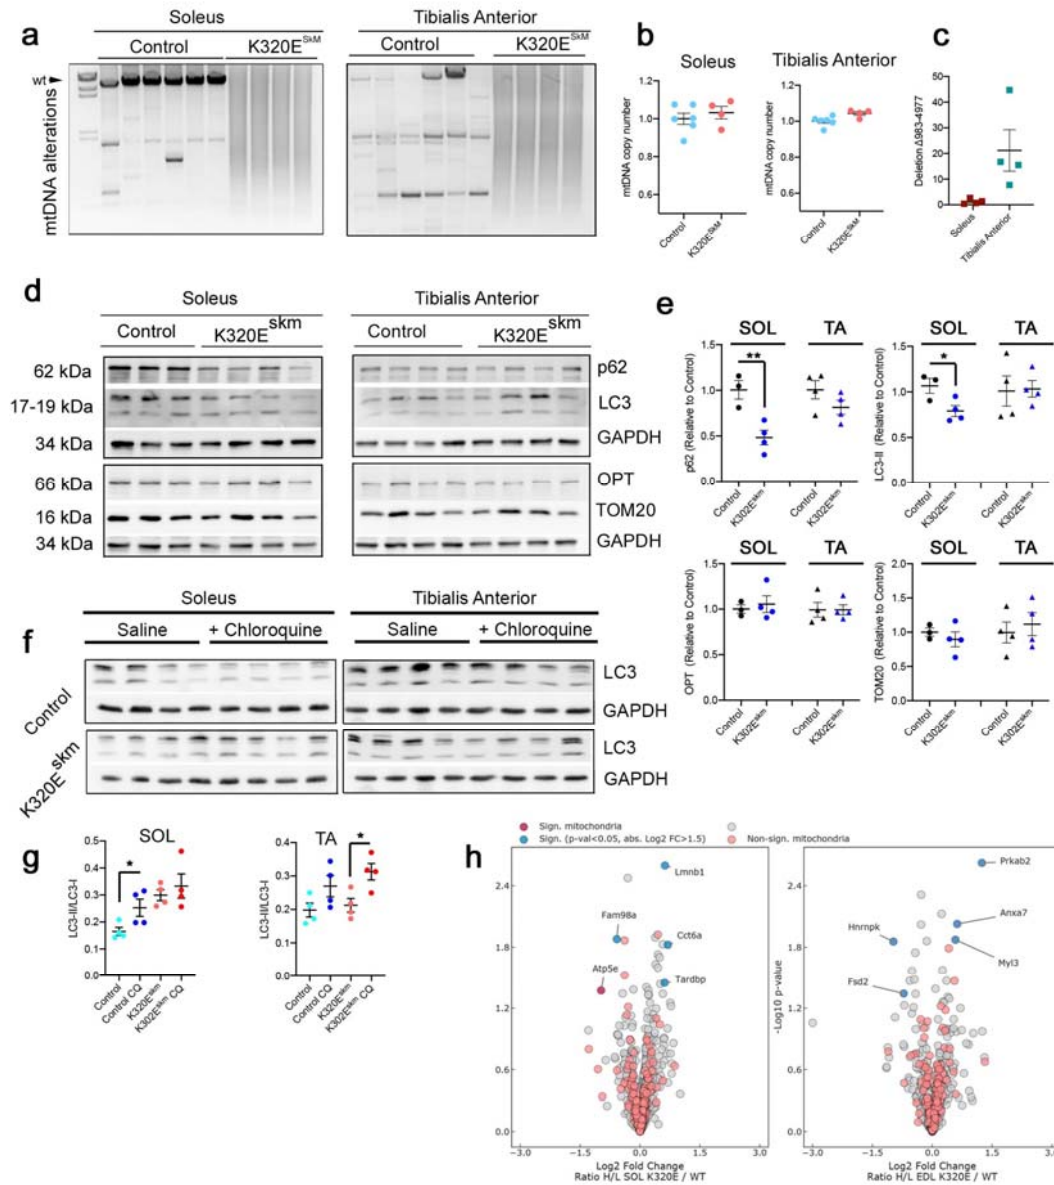

**Figure 1. *In vivo* expression of Twinkle-K320E induces differential accumulation of mtDNA alterations in muscles.** (a) Long range PCR analysis, (b) quantification of mtDNA copy number and, (c) qPCR quantification of deletion mtDNA-Δ983-4977 in *M. soleus* and *M. Tibialis anterior* from 24 months old control and K320E<sup>SKM</sup> mice. (d, e) Western blot analysis and quantification of the indicated proteins in muscle extracts from 24 months old mice. *M. soleus*, control: n=3; Twinkle-K320E: n=4. *M. tibialis anterior*, control: n=4; Twinkle-K320E: n=4. (f, g) Western blot analysis and quantification of LC3 flux (LC3-II/LC3-I ratio) in muscle extracts from mice treated with saline or 50mg/kg chloroquine 4 hours before euthanasia. n=4 mice per treatment and genotype. Unpaired Students' T-test. Mean ± SEM. (h) Volcano plots for mitochondrial and non-mitochondrial proteins detected in the muscles analysed for *in vivo* Pulse SILAC. Red dots: mitochondrial proteins; dark red: mitochondrial proteins with significant difference; blue dots: non mitochondrial proteins with significance difference. (p-value < 0.05 and a H/L ratio fold change > 1.5). n=5.

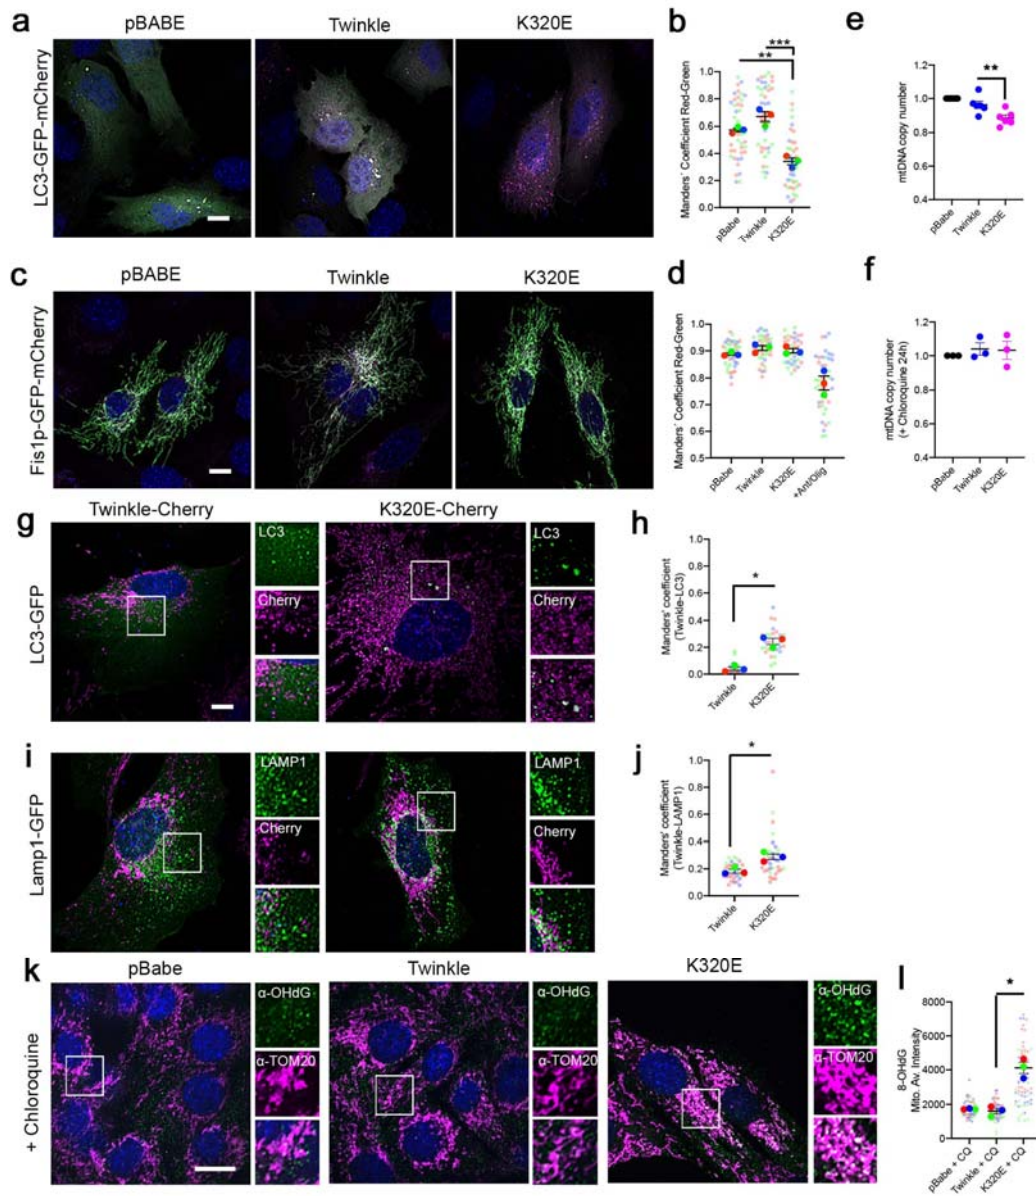

**Figure 2. Twinkle-K320E triggers mtDNA damage and induces autolysosome accumulation independent of bulk mitophagy.** (a-e) C2C12 expressing untagged Twinkle constructs transiently expressing the autophagy reporter LC3-GFP-mCherry or (c) the mitophagy reporter Fis1p-GFP-mCherry. Red signal shows lysosomal localization. (b, c) Manders' coefficient Red / Green quantification of transfected cells. n=3, 10-15 cells per replicate. Cells treated overnight with 10 $\mu$ M Antimycin/Oligomycin were used to induce canonical mitophagy. (e, f) mtDNA copy number in C2C12 cells stably expressing Twinkle or Twinkle-K320E (K320E), respectively, vs. empty vector (pBabe). In (f), mtDNA levels were recovered by treating cells with the lysosomal inhibitor chloroquine for 24h, n=3. (g-h) Confocal images and quantification of C2C12 expressing mCherry tagged Twinkle transfected with plasmids encoding the autophagosome marker LC3-GFP and (i, j) lysosome marker Lamp1-GFP. Manders' colocalization coefficient was used to confirm Twinkle colocalization with autophagic organelles, n=3 (>10 cells per experiment). (k) mtDNA oxidative damage detected by immunofluorescent labelling with  $\alpha$ -OHdG and  $\alpha$ -TOM20 in cells expressing Twinkle and treated with chloroquine (CQ) for 24h. (l) Relative intensity quantification of  $\alpha$ -OHdG signal inside the mitochondrial network. Scale Bar, 10 $\mu$ m. (c-f and l) ANOVA, Tukey multiple comparison. \*\*, p<0.01; \*\*\*, p<0.001. (h and j) Unpaired Student's T-test. \*, p<0.05. Mean  $\pm$  SEM.

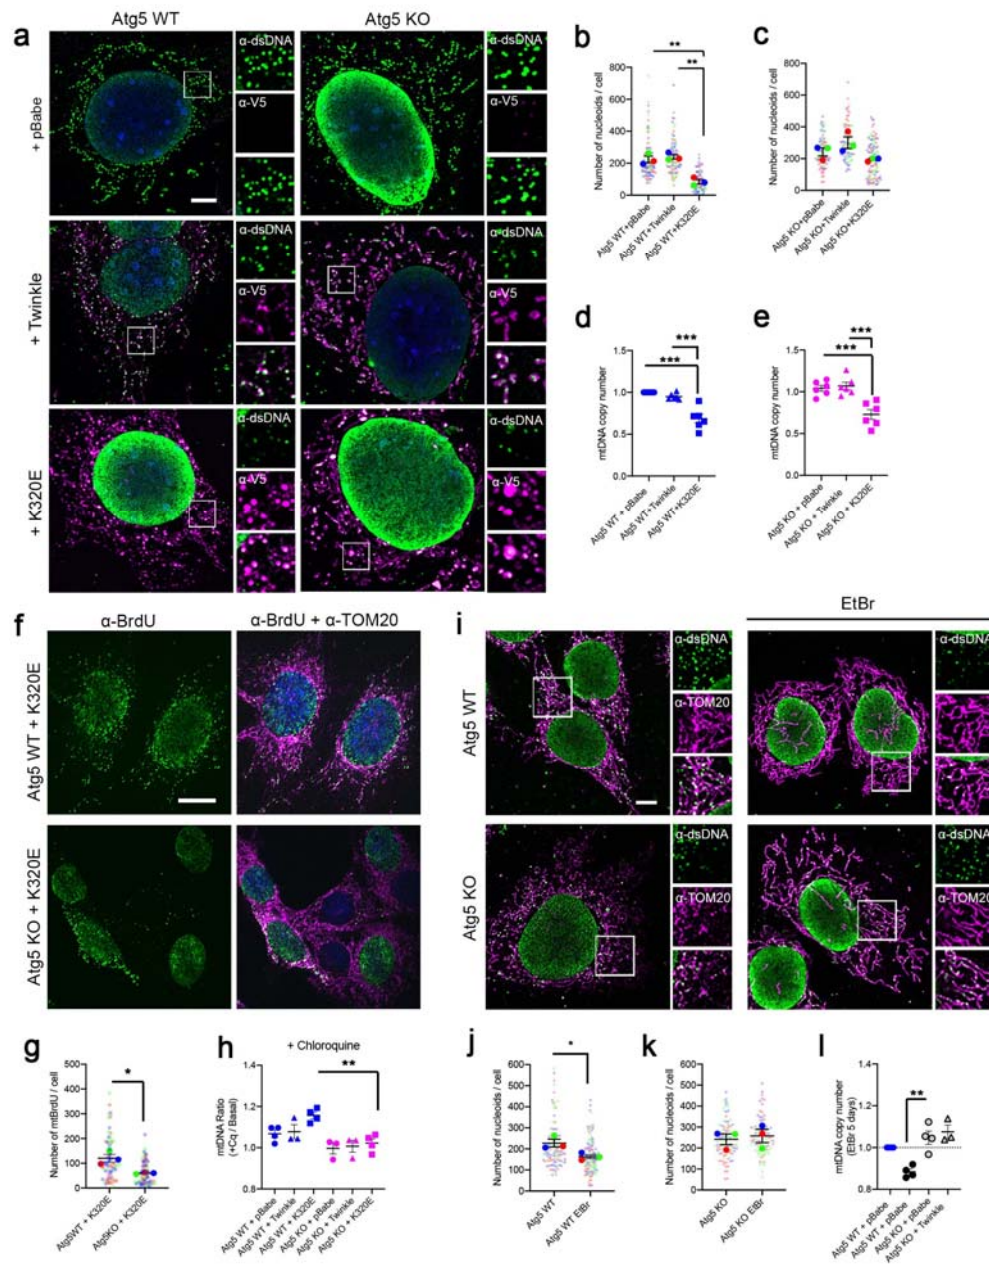

**Figure 3. Autophagy is required for mtDNA clearance after mtDNA damage.** Atg5 WT and KO cells were transduced with Twinkle-APEX-V5 plasmids. **(a)**  $\alpha$ -DNA and  $\alpha$ -V5-tag immunofluorescence confirming localization of Twinkle in mtDNA containing nucleoids. Scale bar 5  $\mu$ m. **(b, c)** Quantification of mtDNA foci number in Atg5 WT and Atg5 KO cells. n=3 (>25 cells per experiment). **(d, e)** Steady state mtDNA copy number in Atg5 cells. **(f, g)**  $\alpha$ -BrdU and  $\alpha$ -TOM20 immunofluorescence and quantification of mtDNA replicating foci detected by treating the cells for 6h with 20  $\mu$ M BrdU. n=3, >20 cells per replicate **(h)** Quantification of mtDNA copy number ratio in Atg5 cells treated with Chloroquine for 24h. n=3. **(i-k)**  $\alpha$ -DNA and  $\alpha$ -TOM20 immunofluorescence and mtDNA foci quantification in steady state and in cells treated with 50ng/ul EtBr for 7 days. n=3, >20 cells per replicate. **(l)** mtDNA copy number analysis for steady state and in cells treated for 7 days with EtBr. n=3-4. Scale Bar, 10  $\mu$ m. **(b-e, h and l)** ANOVA, Tukey multiple comparison. \*\*, p<0.01; \*\*\*, p<0.001. **(g, j and k)** Unpaired Student's T-test. \*, p<0.05. Mean  $\pm$  SEM.

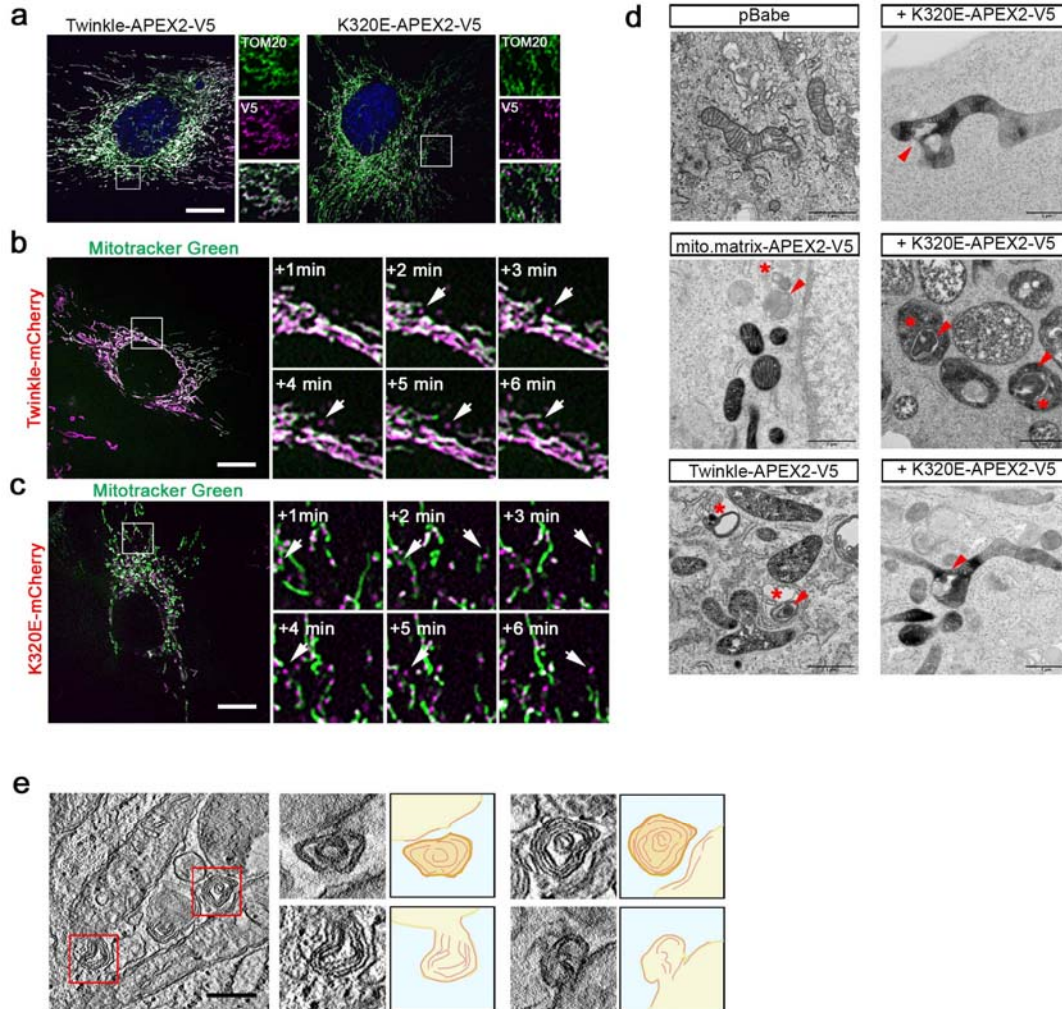

**Figure 4. Twinkle-K320E localizes to specialized mitochondrial regions.** (a) Immunofluorescence of C2C12 cells expressing Twinkle-APEX-V5 variants probed with  $\alpha$ -TOM20 and  $\alpha$ -V5 antibodies. Arrow shows TOM20 negative particle containing Twinkle-K320E. Bar, 10 $\mu$ m (b, c) Live imaging of C2C12 cells expressing tagged Twinkle-mCherry variants counterstained with mitotracker green. Insets represent a 1 min time lapse series of the selected area. Bar, 10 $\mu$ m (d) Transmission electron microscopic pictures of C2C12 cells expressing APEX2-V5 clones. APEX2 generates a black precipitate in presence of DAB. Red arrows indicate multimembrane structures, asterisks indicate autophagosomes. Bar, 1 $\mu$ m. (e) Electron tomography in C2C12 cells expressing Twinkle-K320E illustrating extrusion of mitochondrial fragments containing multimembrane structures. Bar, 0,5 $\mu$ m

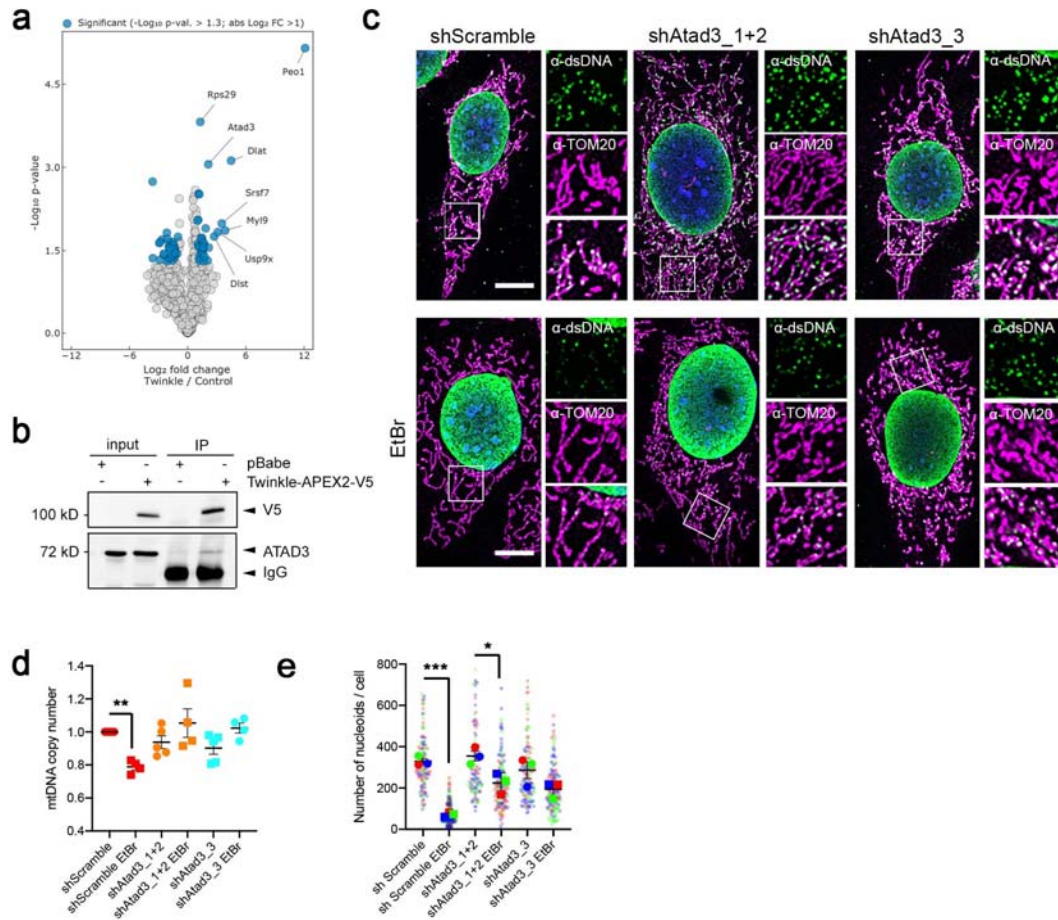

**Figure 5. Twinkle mediates interaction of nucleoids with the inner mitochondrial membrane protein ATAD3.** (a) Volcano plot showing proteins enriched after immunoprecipitation of Twinkle-APEX2-V5 in C2C12 cells. Differentially enriched proteins compared with cells transfected with empty vector ( $p\text{-value} < -0.05$  and  $\text{FC} > 2$  or  $< -2$ ) are highlighted in blue (Peo1 = Twinkle). (b) Co-immunoprecipitation of V5-tagged Twinkle and ATAD3. (c)  $\alpha\text{-TOM20}$  and  $\alpha\text{-dsDNA}$  immunofluorescence in Atad3 KD MEFs in steady state and grown for 7 days in presence of 50ng/ml EtBr. Bar, 10  $\mu\text{m}$ . (d) Quantification of mtDNA copy number in steady state and EtBr treated cells.  $n=4-5$ . and (e) mtDNA foci quantification for Atad3 KD in steady state and EtBr treated cells.  $n=3$ ,  $>20$  cells per replicate. ANOVA, Tukey multiple comparison. \*,  $p < 0.05$ , \*\*,  $p < 0.01$ . Mean  $\pm$  SEM.

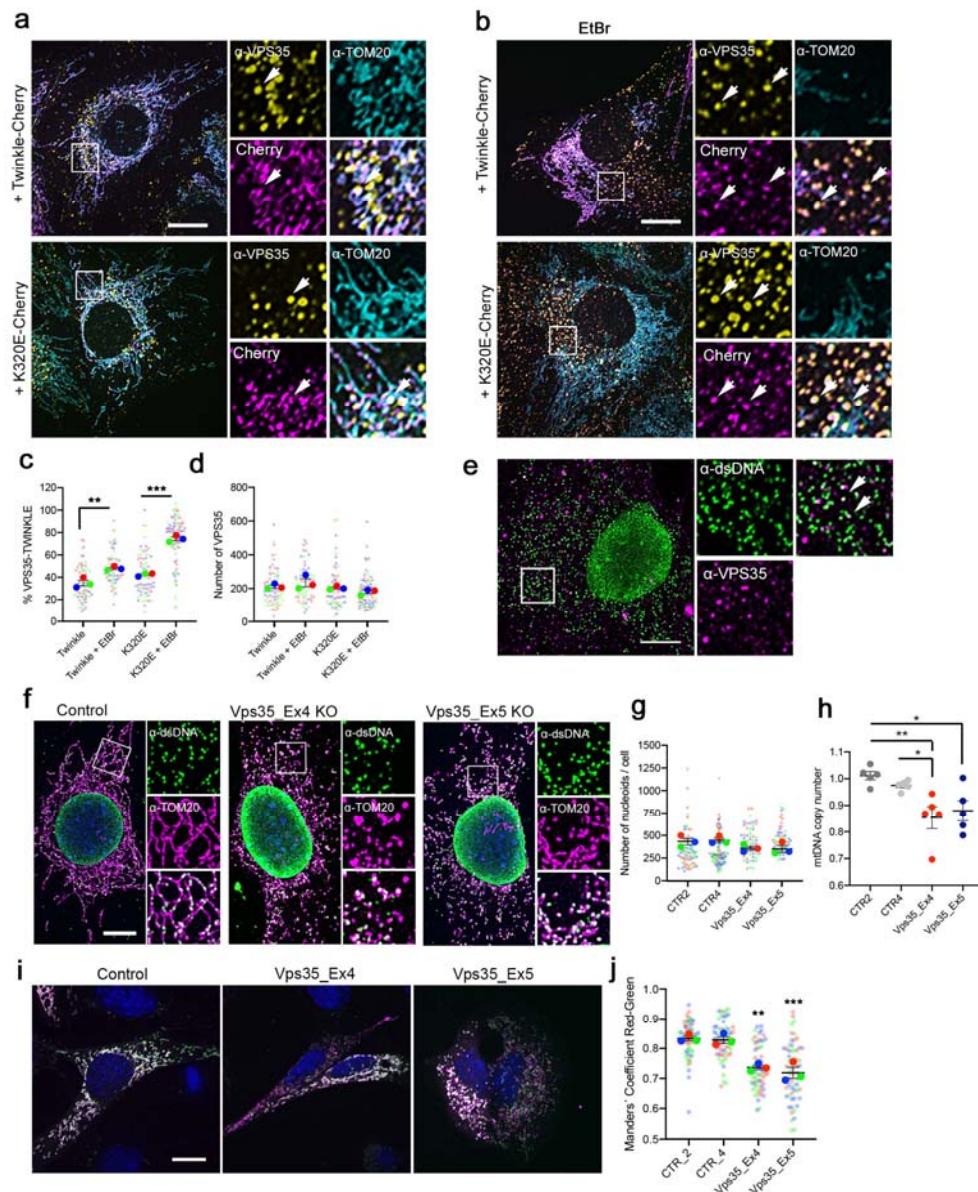

**Figure 6. VPS35 is required for autophagy-dependent mtDNA removal.** Immunofluorescence of C2C12 cells expressing Twinkle-mCherry variants labelled with α-VPS35 and α-TOM20 and grown in (a) basal medium or (b) treated for 7 days with 50ng/ml EtBr. Arrows indicate colocalization. Bar, 10µm. (c, d) Quantification of VPS35 particles in contact with Twinkle. n=3 (e) Immunofluorescence of C2C12 wild type cells labelled with α-dsDNA and α-VPS35. Arrows indicate colocalization between VPS35 and dsDNA puncta. Bar, 10µm. (f) α-TOM20 and α-dsDNA immunofluorescence of *Vps35* KO MEFs. Bar, 10µm. (g) mtDNA foci analysis (n=3) and (h) mtDNA copy number quantification of *Vps35* KO cells. n=5. (i) Control and *Vps35* KO cells transfected with Fis1p-GFP-mCherry plasmid to detect mitophagy. Red signal represents mitolysosomes. Bar, 10µm. (j) Manders' coefficient quantification of transfected cells. n=3. A decrease in Manders' coefficient indicates process activation. n=3 (20 images per replicate). ANOVA, Tukey multiple comparison. \*, p<0.05; \*\*, p<0.01; \*\*\*, p<0.001. Mean ± SEM

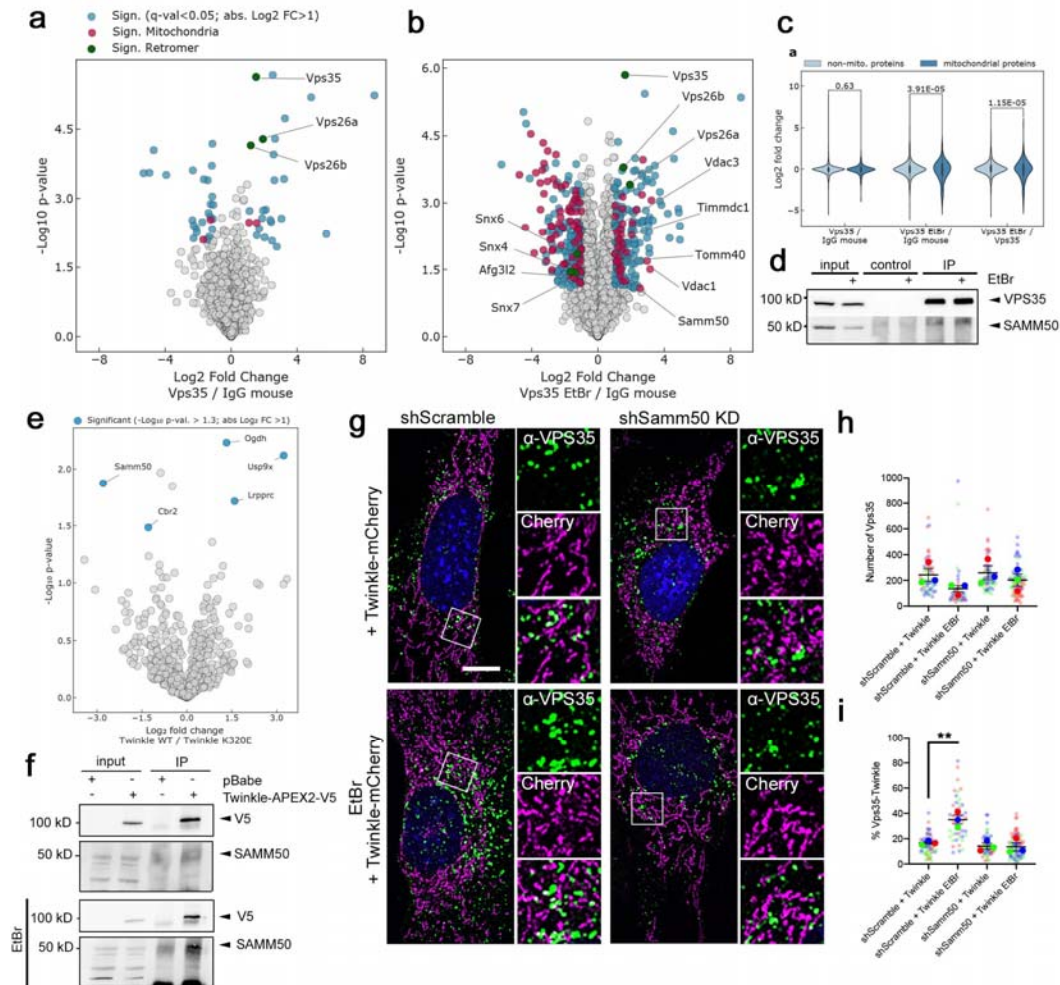

**Figure 7. SAMM50 is a mitochondrial receptor for VPS35 recruitment into mitochondrial subcompartments containing nucleoids.** (a) Volcano plot showing proteins enriched after immunoprecipitation of VPS35 in MEFs. Only differentially enriched proteins are highlighted (adj. p-value <0.05 and FC >2 or <-2). Blue, non-mitochondrial proteins; Red, mitochondrial proteins; Green, retromer proteins (b) Comparison of VPS35 IP profiles of cells grown in normal medium or 1 week treated with 50ng/ml EtBr. n=3. (c) Violin Plots showing enrichment of mitochondrial proteins upon pull down of VPS35 in presence of EtBr. Numbers indicate p-value. Students' T-test. (d) Co-Immunoprecipitation of VPS35 and SAMM50 in steady state and EtBr treated cells. IgG from mouse was used as a control. (e) Comparison of interactome profiles of Twinkle and K320C. n=3. (f) co-Immunoprecipitation of Twinkle and SAMM50 in steady state and in cells treated with EtBr for 1 week. (g) Immunofluorescence of control and Samm50 KD MEFs transduced with Twinkle-mCherry constructs and labelled with  $\alpha$ -VPS35 in basal and 7 days treated with 50ng/ml EtBr. Bar, 10 $\mu$ m. (h, i) Quantification of VPS35 particles and VPS35 in contact with Twinkle. n=3, >20 cells per replicate. ANOVA, Tukey multiple comparison. \*\*, p<0.01. Mean  $\pm$  SEM



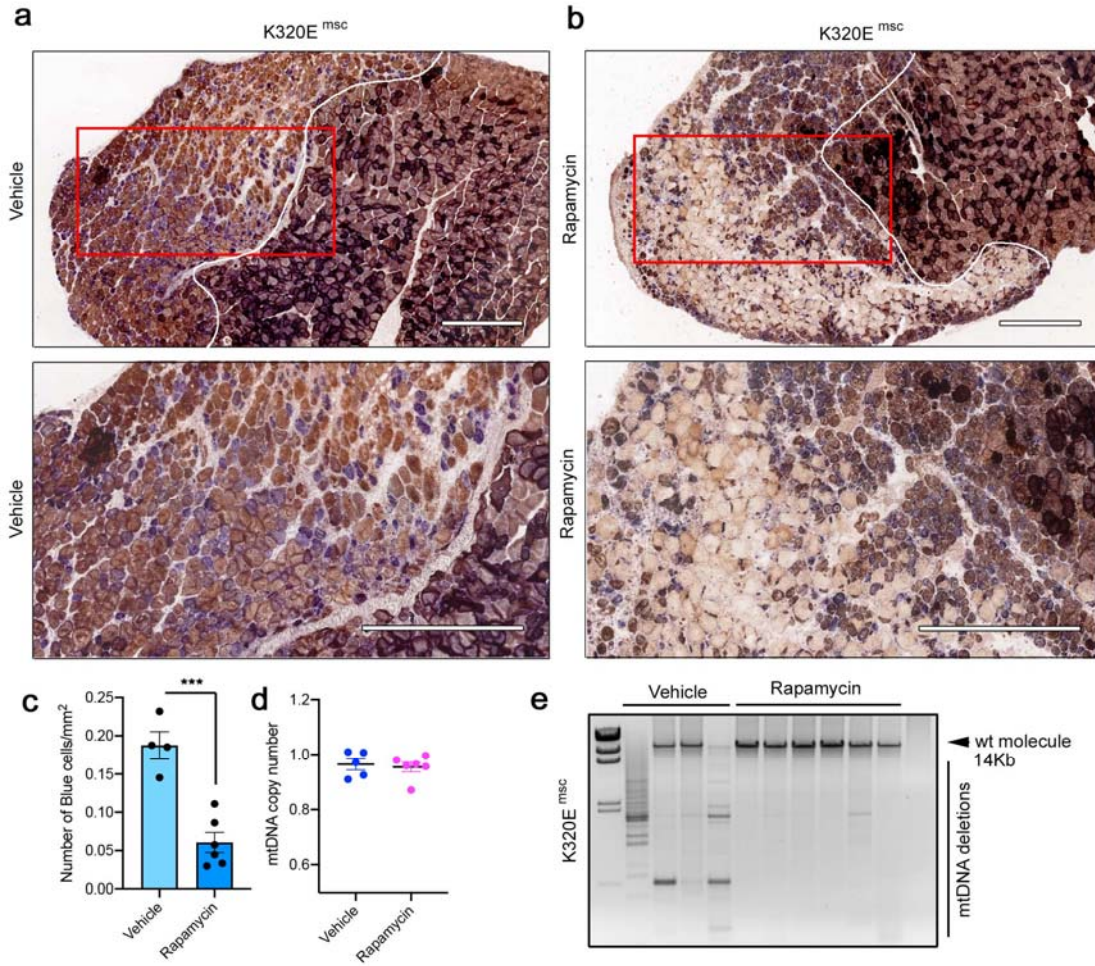

**Figure 8. Rapamycin eliminates mtDNA deletions without affecting copy number *in vivo*.** COX-SDH staining of regenerated TA muscle from Pax7-K320E mice (K320E<sup>msc</sup>). After cardiotoxin induced injury, mice were injected for five days either with (a) vehicle or (b) 2 mg/Kg Rapamycin. Bar, 500µm. (c) Quantification of COX negative cells (blue) in the injured area. (d) mtDNA quantification by qPCR or (e) Long-range PCR in regenerated muscle from K320E<sup>msc</sup> mice treated with vehicle or with Rapamycin. n=5-6 mice per condition, genotype and treatment. (c and d) Unpaired Students' T-test. Mean ± SEM.

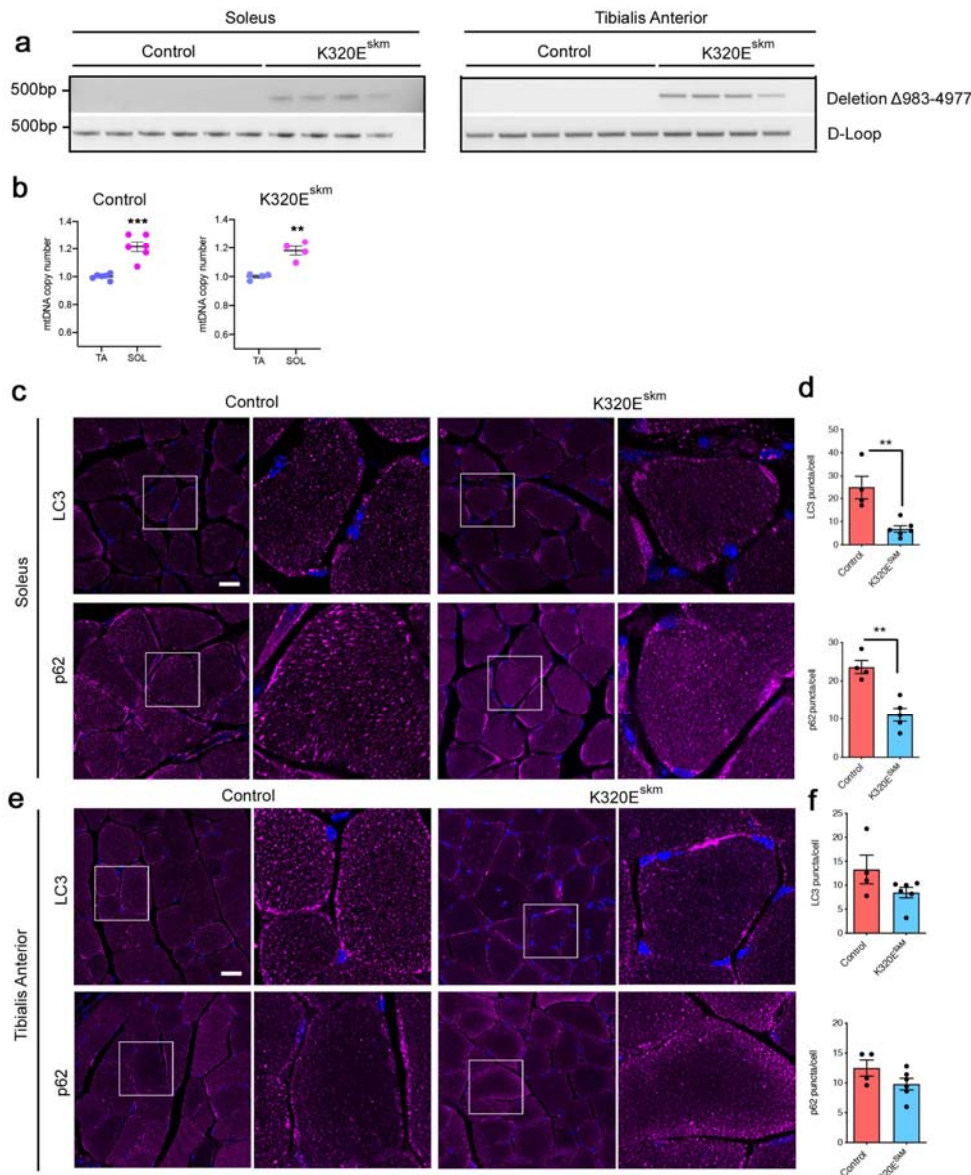

**Figure S1.** (a) Conventional PCR with specific oligonucleotides flanking the deletion mtDNA- $\Delta 983-4977$ . (b) mtDNA copy number in muscles from 24 months old control and Twinkle-K320E mice. This graph shows a comparison between samples analysed in Fig 1b. (c-f) *In situ* immunofluorescence and image quantification showing autophagic markers LC3 and p62 in cryosections of M. soleus (c, d) and M. tibialis anterior (e, f). 5 random pictures with 4 fibers per picture were analysed per animal to obtain averaged values. Control: n=4; Twinkle-K320E: n=5. Bar, 20 $\mu$ m. (b, c, e, h and i) Unpaired Students' T-test. Mean  $\pm$  SEM.

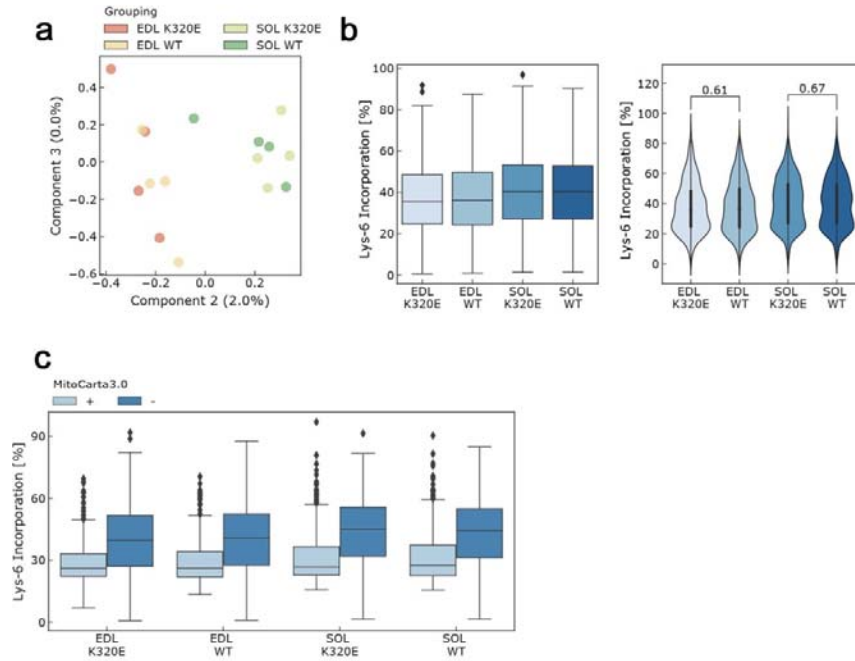

**Figure S2.** (a) Component analysis of *In vivo* Pulse SILAC in *M. extensor digitorum longus* (EDL) and *M. soleus*. (b) Box plot and Violin plots showing Lys-6 incorporation in muscles from Twinkle mice. (c) Box plot analysis for mitochondrial and non-mitochondrial proteins detected in the muscles analysed for *in vivo* Pulse SILAC. n=5.

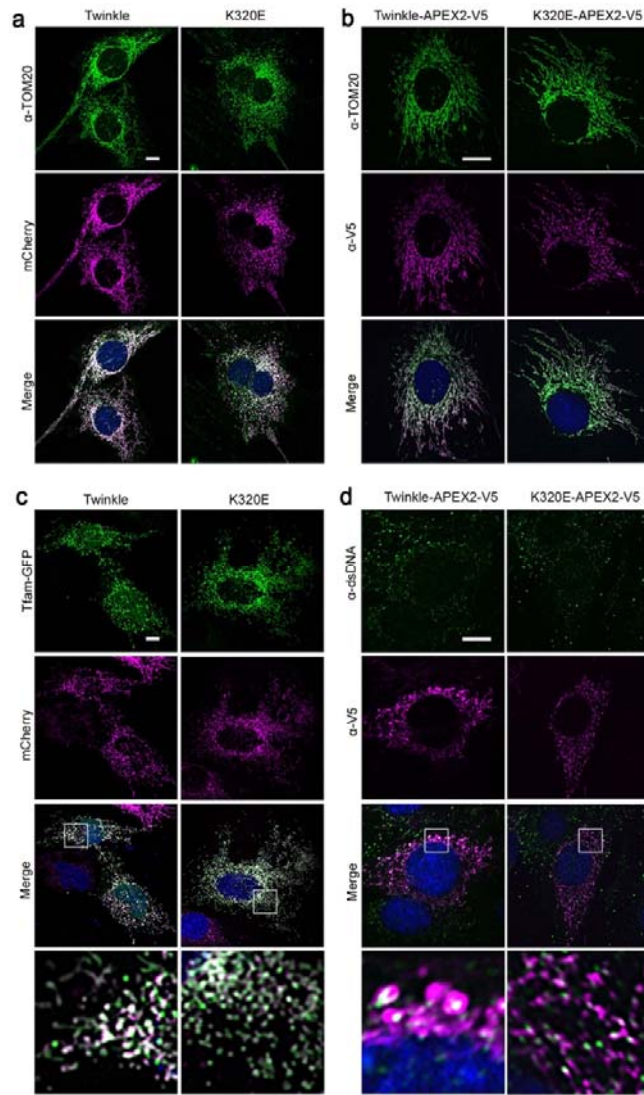

**Figure S3.** (a, b)  $\alpha$ -TOM20 immunofluorescence of clones expressing (a) m-Cherry and (b) APEX2-V5 tagged Twinkle variants. (c, d) Immunofluorescence of (c) m-Cherry tagged clones transiently expressing Tfam-GFP and (d) APEX-V5 tagged clones probed with  $\alpha$ -dsDNA antibody showing nucleoid localization (see magnifications in lower panels). Bar, 10  $\mu$ m.

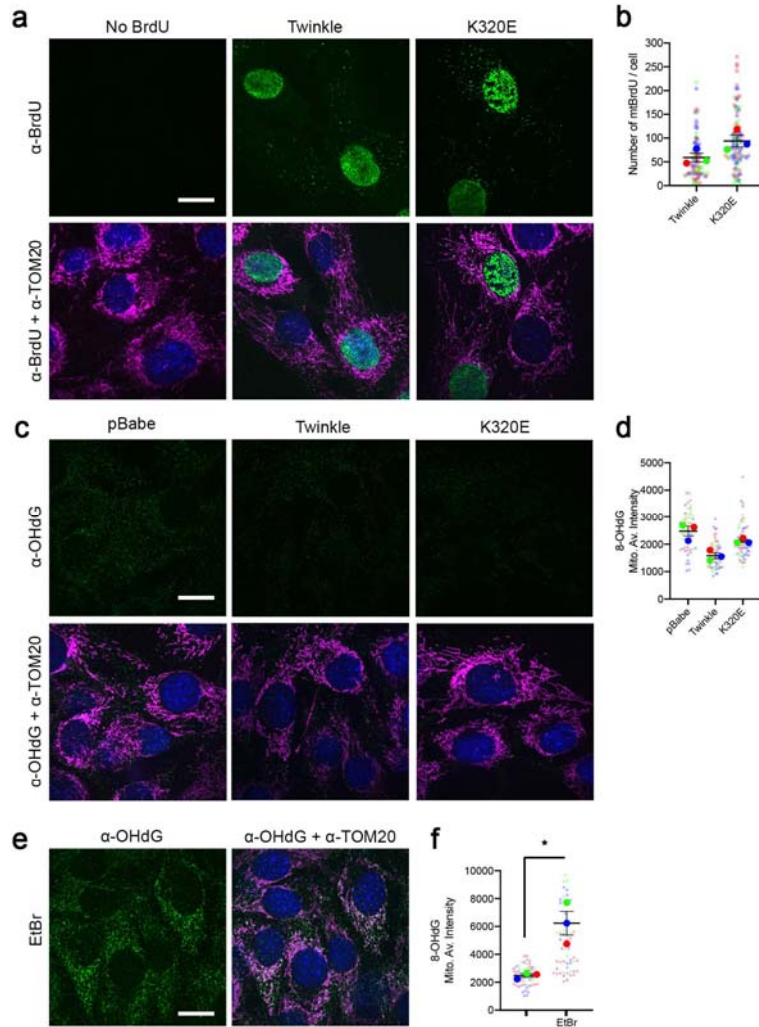

**Figure S4.** (a, b) Analysis of mtDNA replicating foci by  $\alpha$ -BrdU and  $\alpha$ -TOM20 immunofluorescence of C2C12 cells expressing Twinkle plasmids treated with 20  $\mu$ M BrdU. Only BrdU foci inside the mitochondrial network were analysed. (c, d)  $\alpha$ -OHdG and  $\alpha$ -TOM20 immunofluorescence and quantification of the average intensity inside the mitochondrial network of C2C12 in steady state. (e, f)  $\alpha$ -OHdG and  $\alpha$ -TOM20 immunofluorescence and quantification of the average intensity inside the mitochondrial network in C2C12 treated 24h with 50 ng/ul EtBr. Students' T-test. Mean  $\pm$  SEM. \*,  $p < 0.05$ . Scale Bar, 10  $\mu$ m.

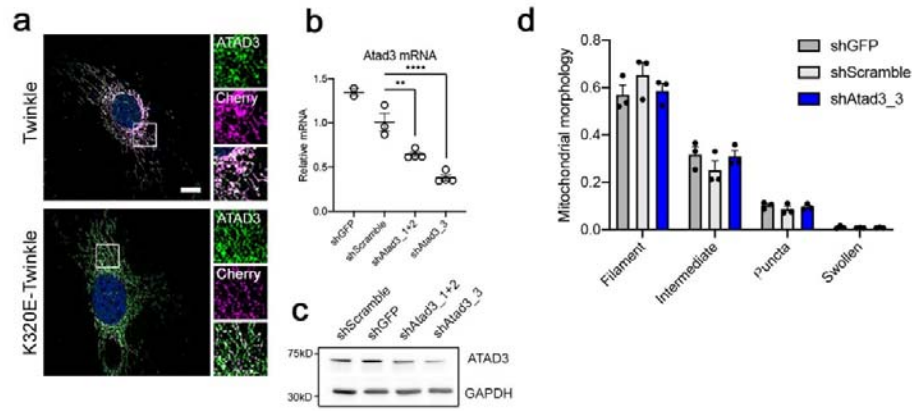

**Figure S5.** (a) Immunofluorescence of C2C12 cells expressing Twinkle-mCherry stained with  $\alpha$ -ATAD3 antibody. Scale bar, 10  $\mu$ m. (b) Analysis of Atad3 expression by RT-qPCR and (c) western blot upon shRNA transduction.  $n=3-4$  (d) Quantification of Mitochondrial morphology in shATAD3 cells.  $n=3$ , >30 cells per replicate. (b and d) ANOVA, Tukey multiple comparison. \*\*,  $p<0.01$ ; \*\*\*\*,  $p<0.001$ . Mean  $\pm$  SEM.

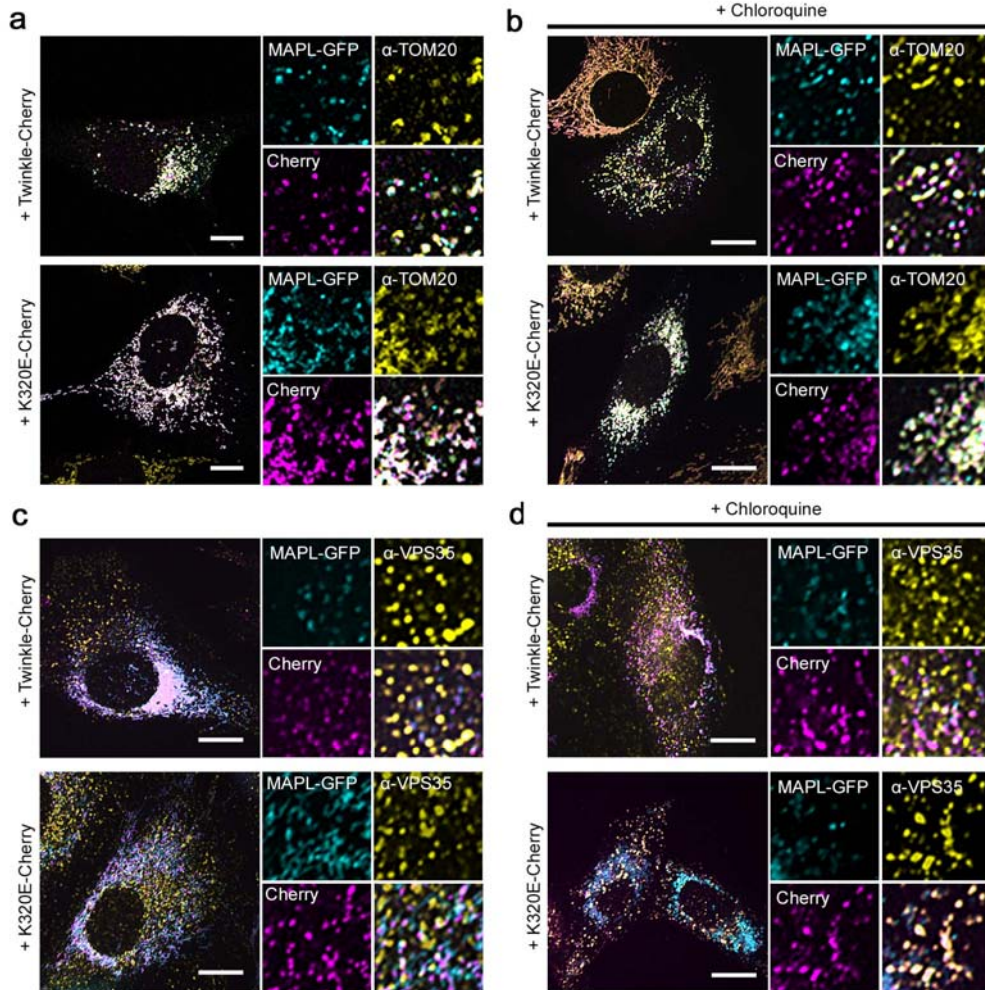

**Figure S6.** (a-c) Immunofluorescence of C2C12 cells expressing Twinkle-mCherry transiently transfected with MAPL-GFP and stained with  $\alpha$ -TOM20 antibody (a, b) or  $\alpha$ -VPS35 antibody (c, d). In (b, d) Cells were treated 4h with 10 $\mu$ M Chloroquine. Bar, 10  $\mu$ m.

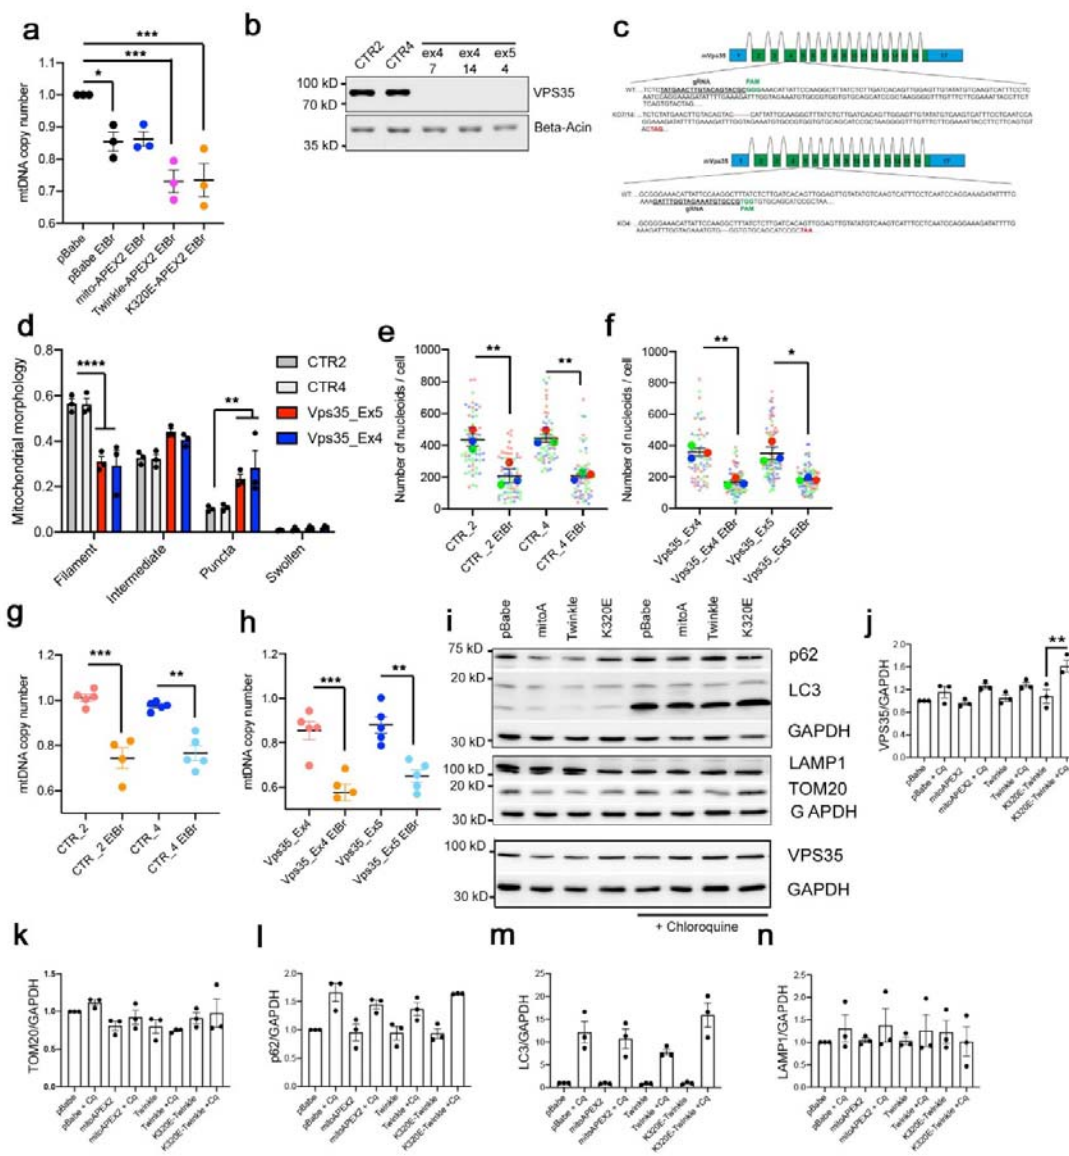

**Figure S7.** (a) mtDNA copy number in C2C12 cells treated for 7 days with 50ng/ml EtBr. n=3. (b) Western blot analysis of MEFs after CRISPR Cas9 mediated KO of *Vps35*. (c) Schematic representation of DNA modification in *Vps35* Exon 4 and Exon 5 triggered by CRISPR-Cas9. (d) Quantification of mitochondrial morphology in *Vps35* KO clones. n=3, >30 cells per replicate. (e) mtDNA foci quantification in control and (f) *Vps35* KO clones treated with EtBr. n=3. (g) qPCR mtDNA copy number analysis of control and (h) *Vps35* KO clones treated with EtBr. Students' T-test. \*\*, p < 0.01; \*\*\*, p < 0.001. n=5. (i) Western blot analysis of autophagy markers and VPS35 levels in C2C12 cells expressing Twinkle-APEX2-V5 variants (WT, KE) or matrix targeted APEX2 protein, treated 24h with 10μM Chloroquine. n=3. (j-n) Intensity quantification of the indicated proteins relative to empty vector pB (pBABE). (a, g, h and j-n) ANOVA analysis of variance. Tukey multiple comparison test. Mean ± SEM. \*, p < 0.05; \*\*, p < 0.01; \*\*\*, p < 0.001. (d) Two-way ANOVA. Control lines were compared with KO lines. \*\*, p < 0.01; \*\*\*\*, p < 0.0001.



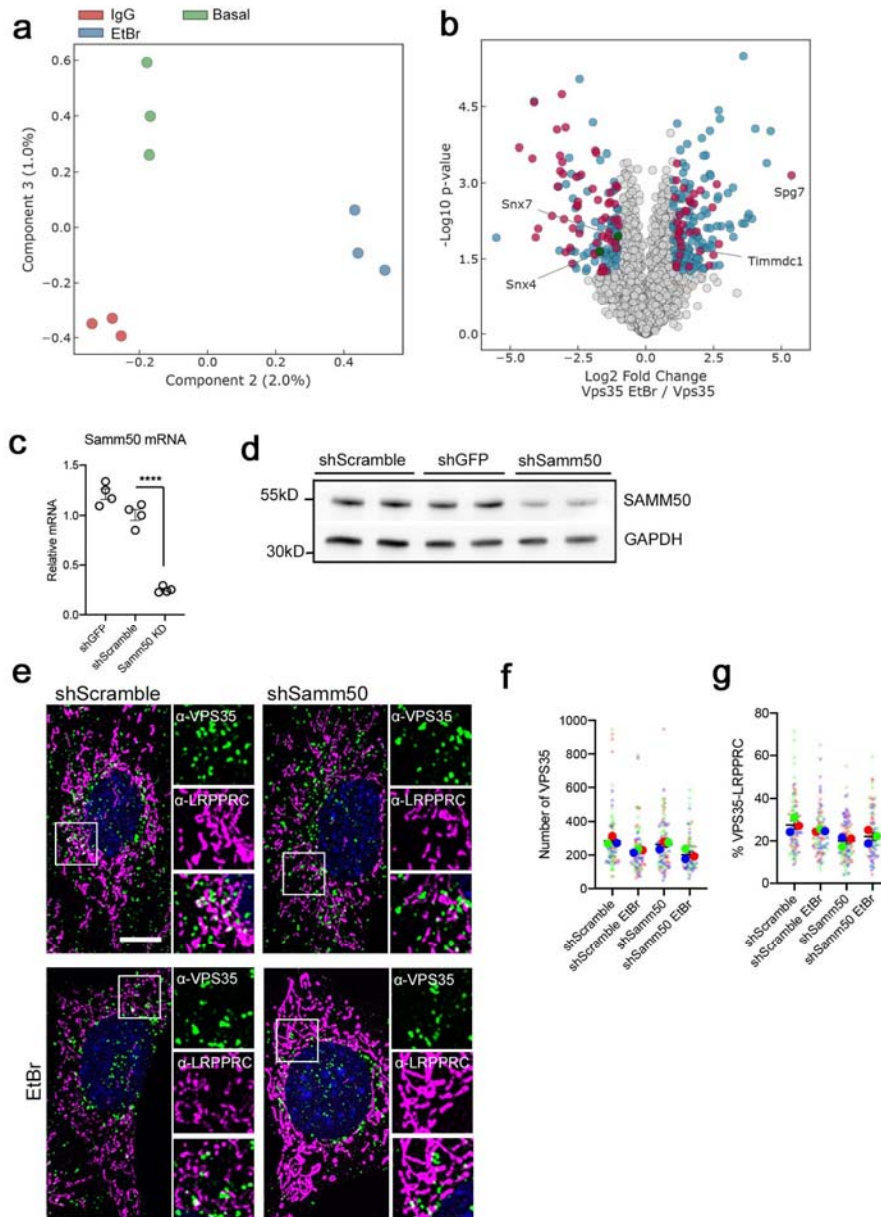

**Figure S8.** (a) Component analysis of VPS35 IP. (b) Comparison of VPS35 IP profiles from cells in basal medium or treated with 50ng/ml EtBr for 1 week. Only significantly different proteins are highlighted. Blue, cytosolic proteins; Red, mitochondrial proteins; Green, retromer proteins. (c) mRNA quantification and (d) western blot analysis of *Samm50* upon shRNA transduction. *Gapdh* mRNA and GAPDH was used as an internal control for both experiments. (e) Immunofluorescence of Control and *Samm50* KD MEFs labelled with α-VPS35 and α-LRPPRC in basal and 7 days treated with 50ng/ml EtBr. Scale bar, 10µm. (f, g) Quantification of VPS35 particles and VPS35 in contact with LRPPRC. n=3. Mean ± SEM. ANOVA analysis of variance. Tukey multiple comparison test.

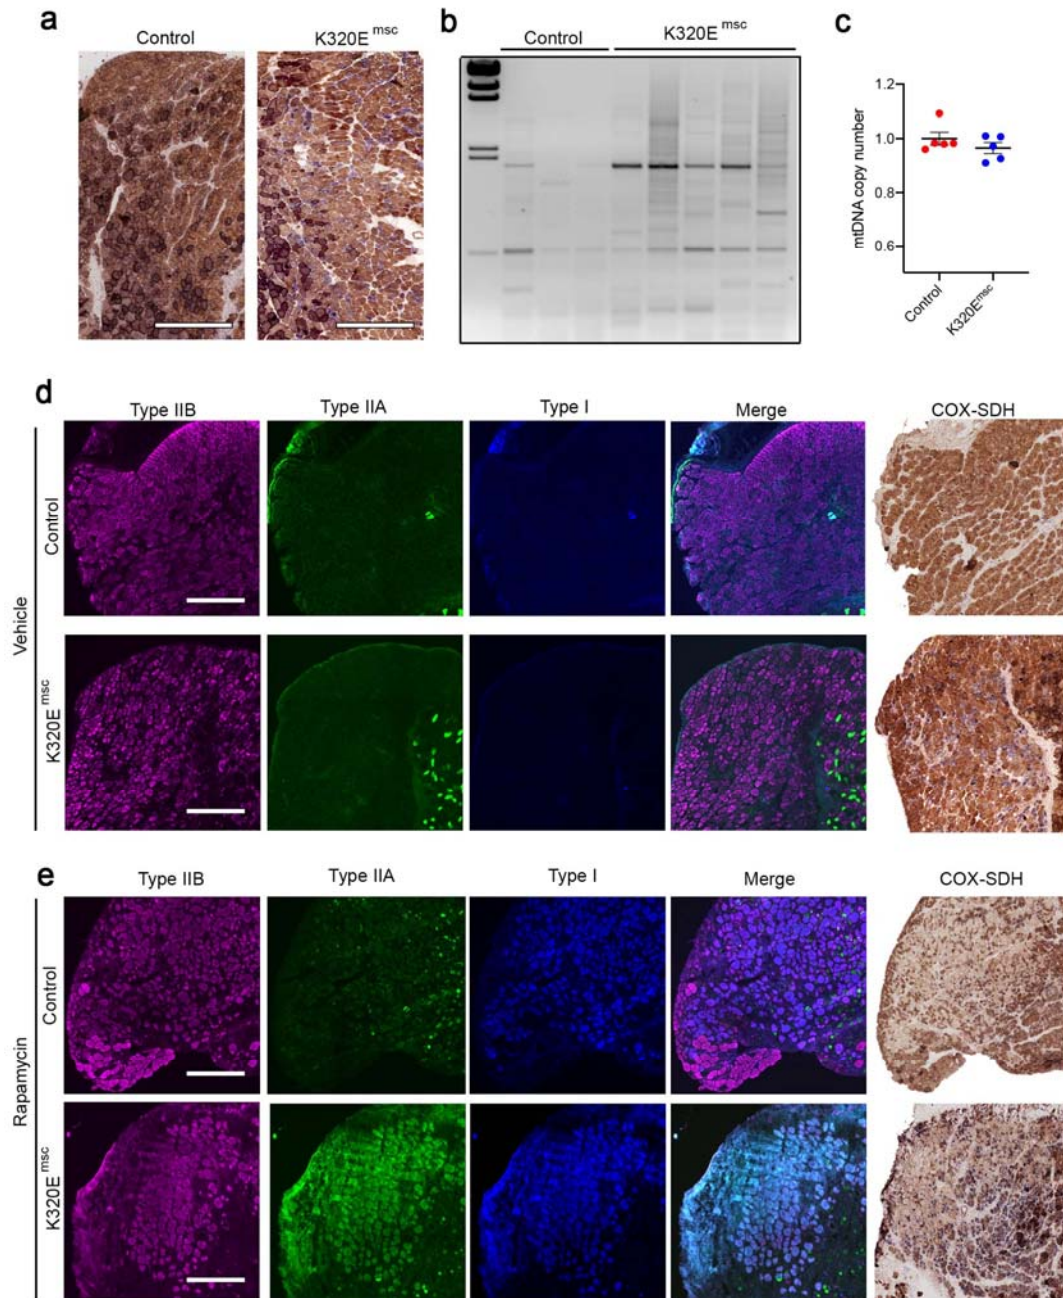

**Figure S9.** (a) Representative image for COX-SDH staining in a regenerated area from the M. Tibialis anterior from control and K320E-Twinkle<sup>msc</sup> mice. Bar, 500  $\mu$ m. (b) Long Range PCR for mtDNA deletions and, (c) mtDNA copy number analysis in control and Twinkle-K320E mice. n=5. Muscle regeneration was induced with intramuscular injection of 10 $\mu$ M Cardiotoxin (*Naja Pallida*). Students' T-test. (d) Fiber type and COX-SDH serial analysis of regenerated muscles in vehicle and (e) rapamycin treated mice. Mean  $\pm$  SEM. Bar, 250  $\mu$ m.
